# Supplementary material
Source: ML conference proceedings conference paper supplement (https://openreview.net/forum?id=Ebt7JgMHv1)

# layer 20

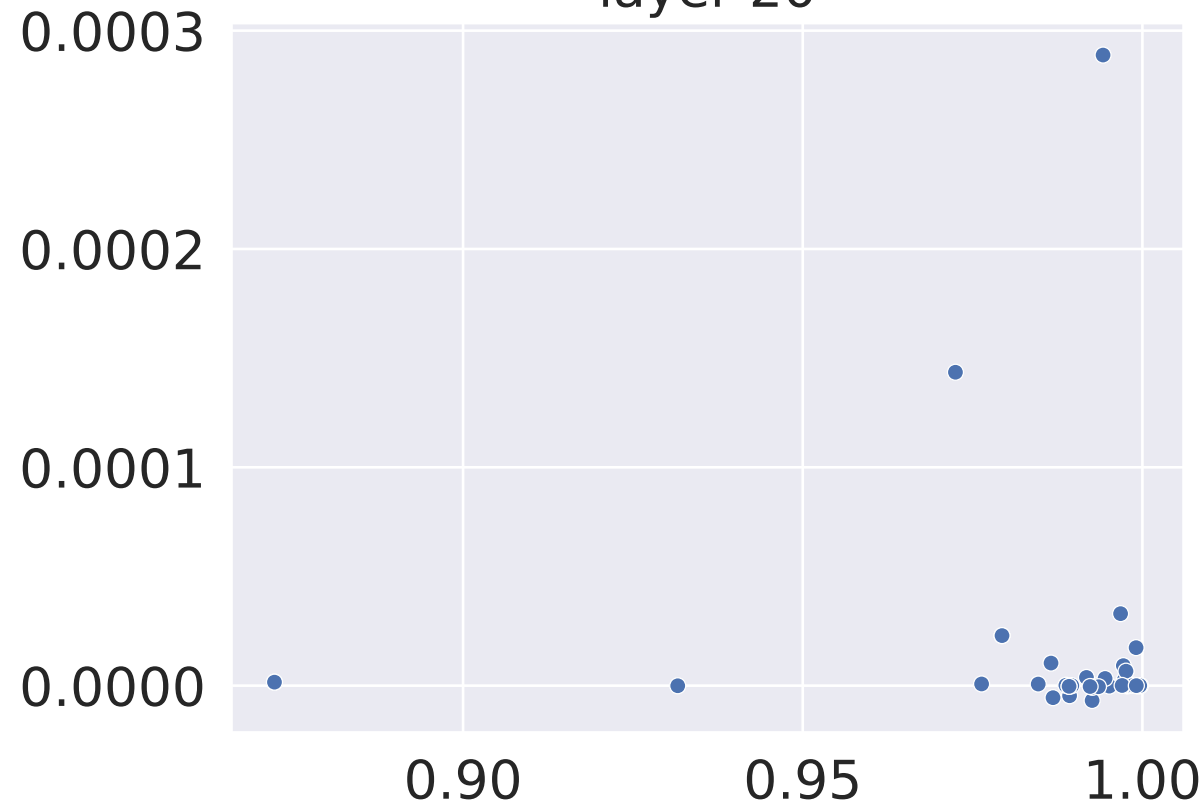

Supplement: supplementary_material [file attachment]

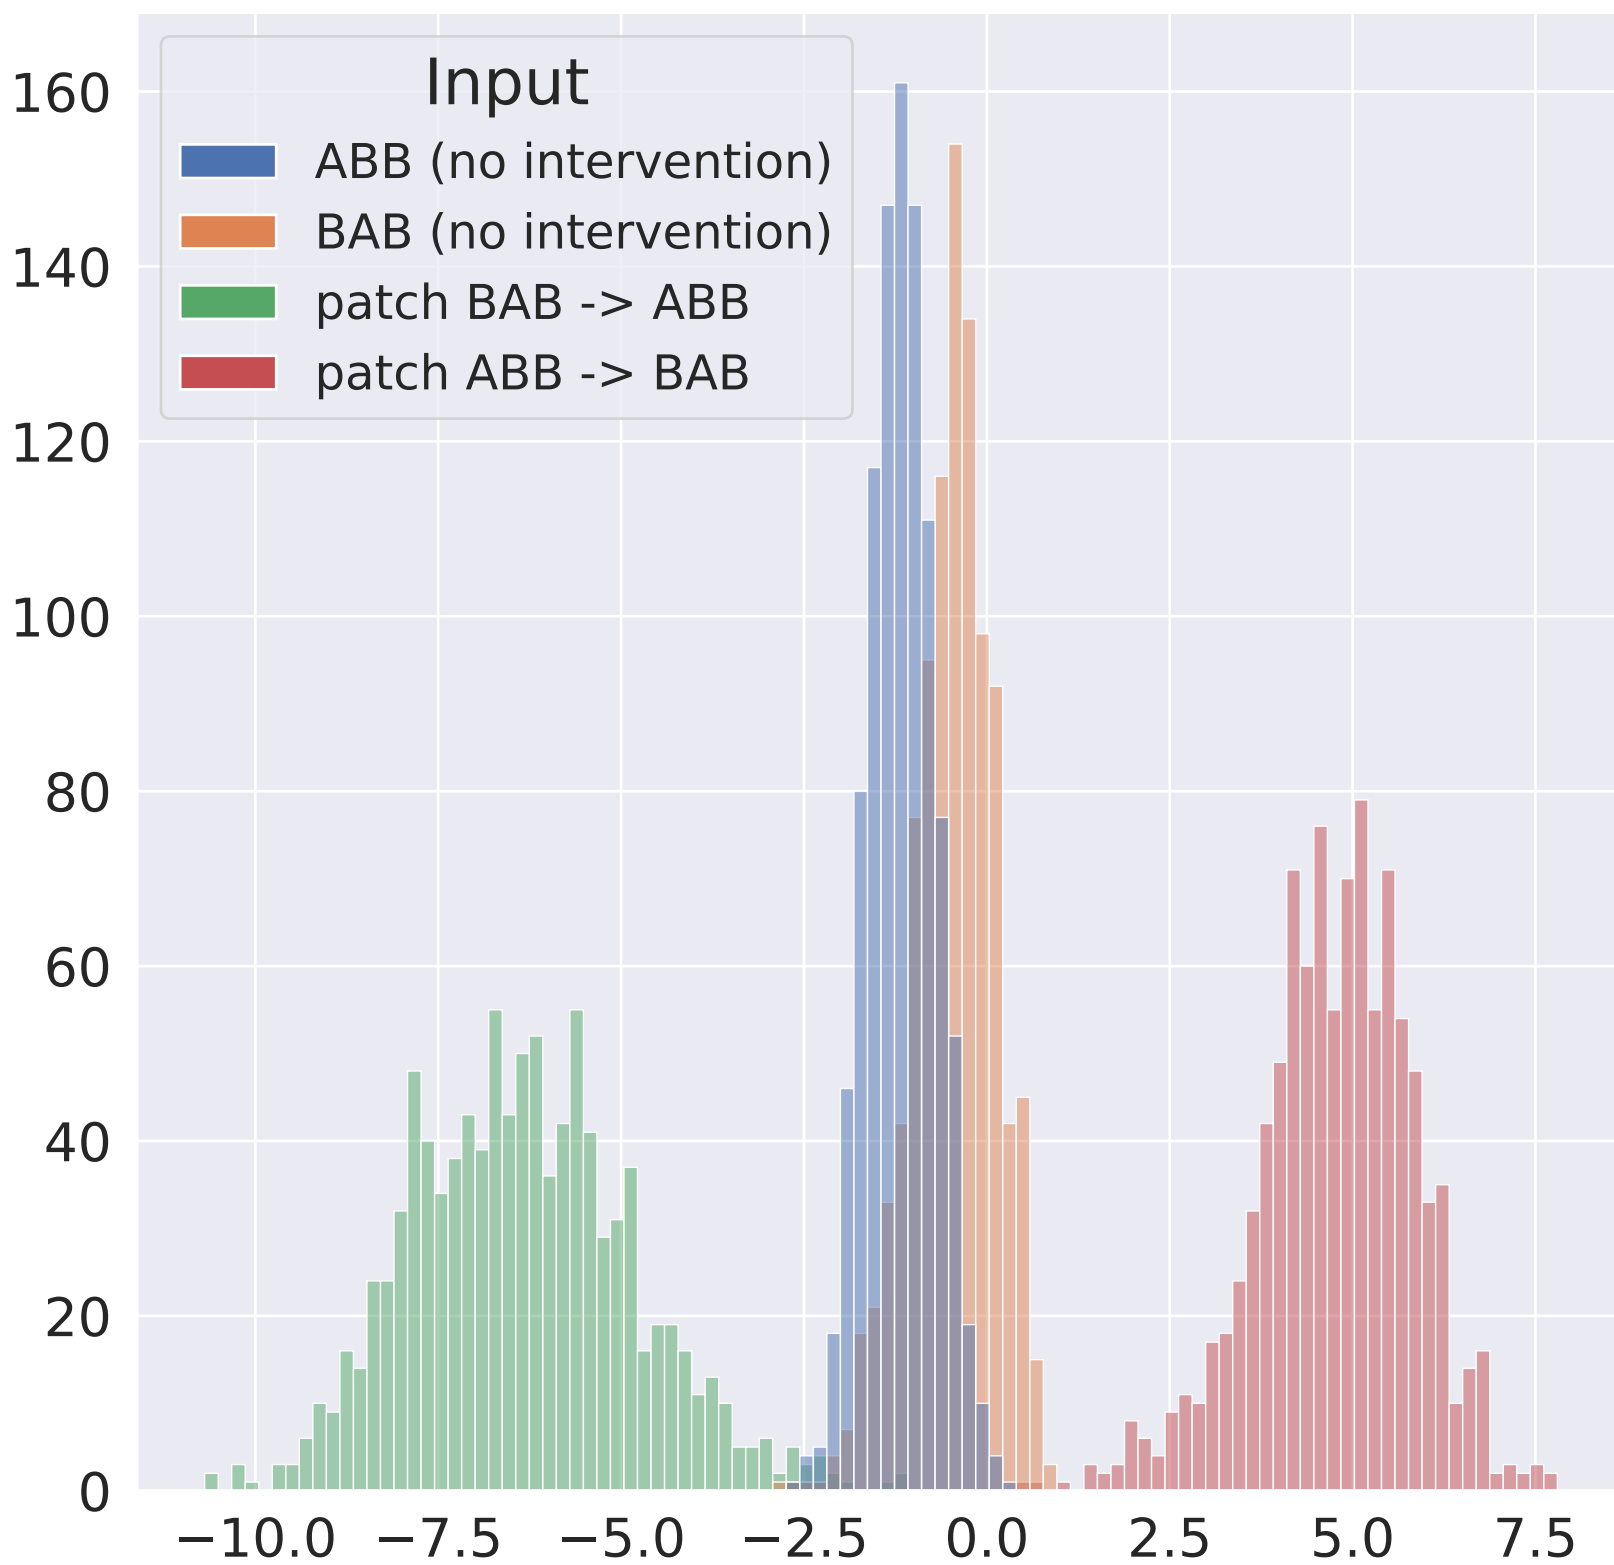

Supplement: supplementary_material [file attachment]

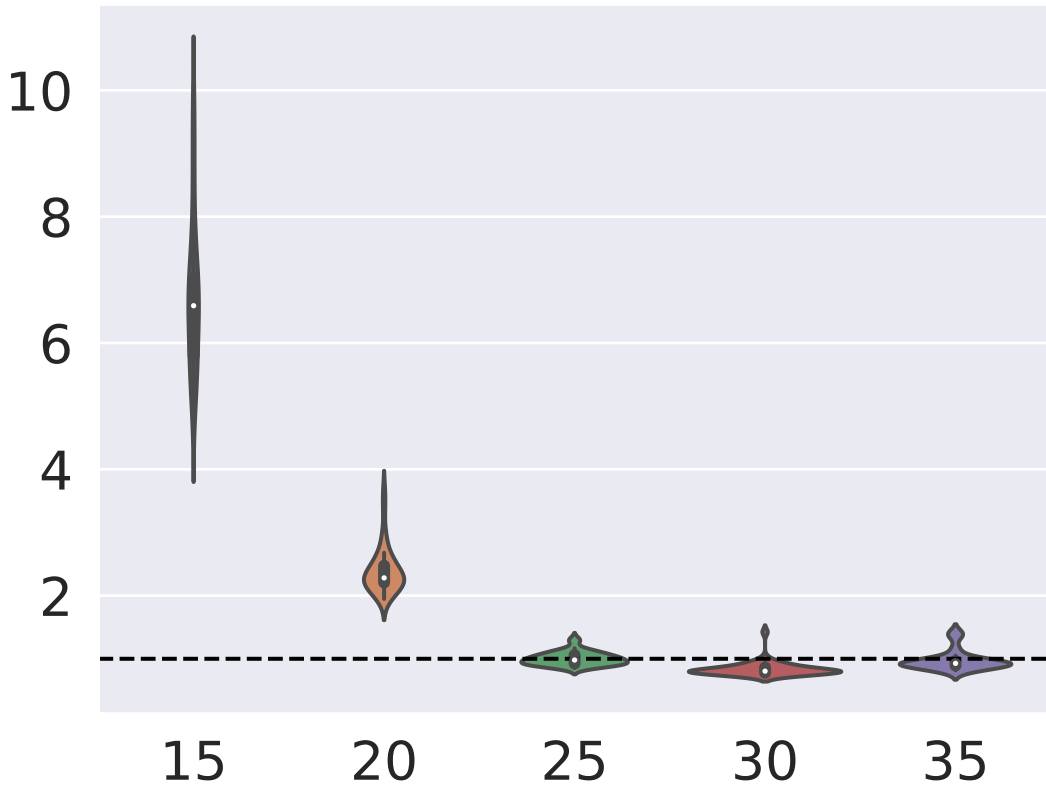

Supplement: supplementary_material [file attachment]

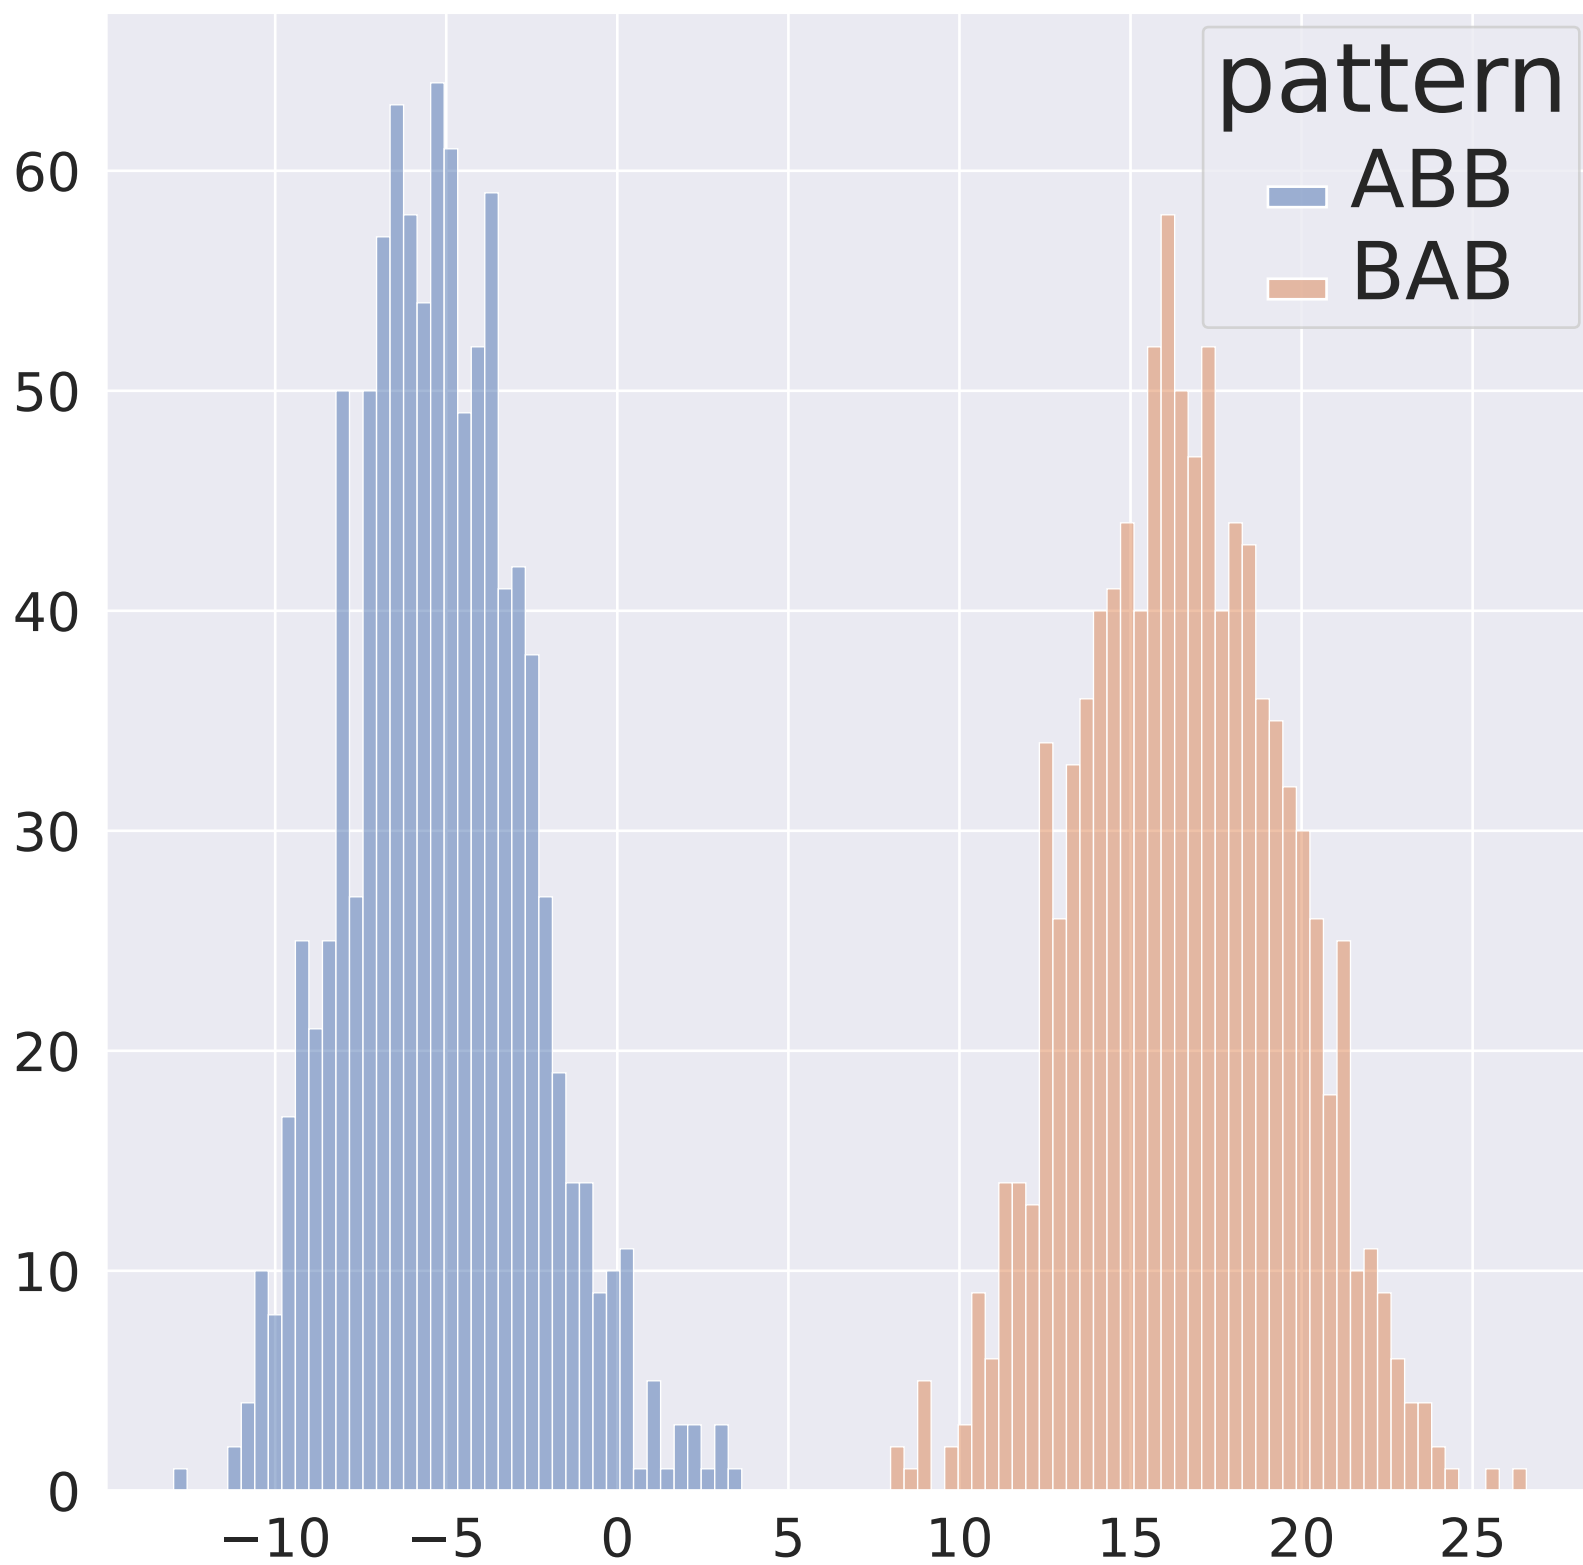

Supplement: supplementary_material [file attachment]

layer 30

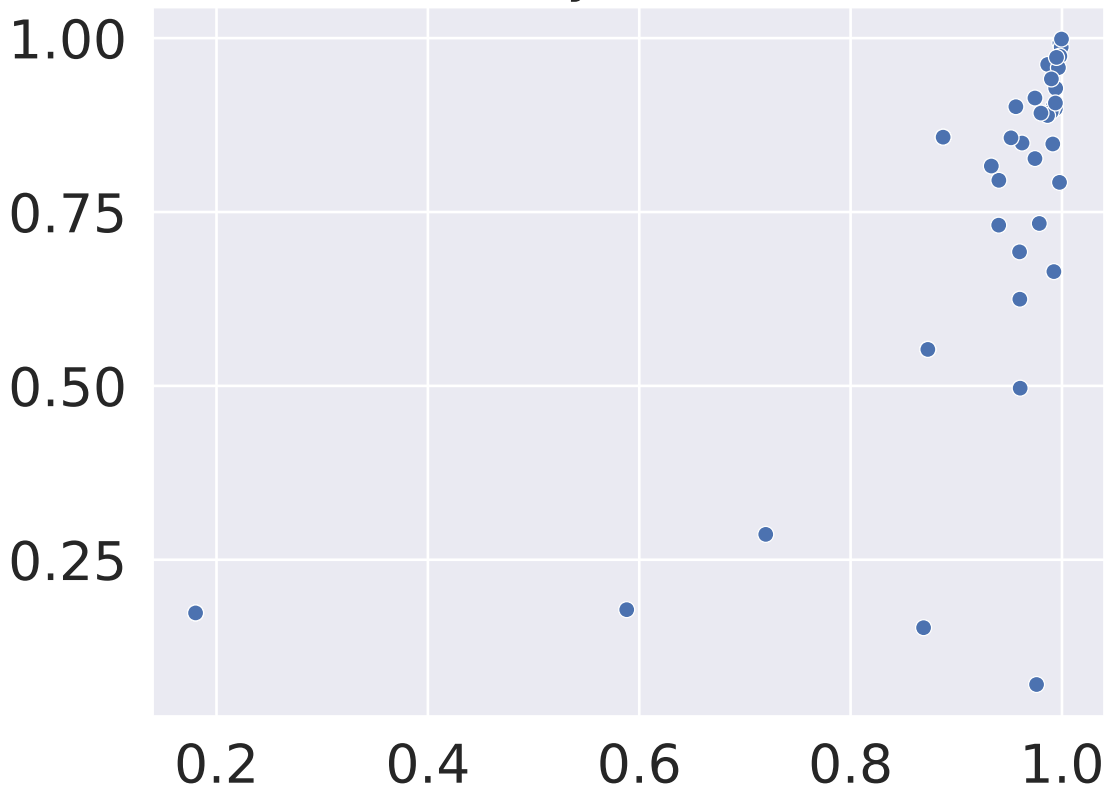

Supplement: supplementary_material [file attachment]

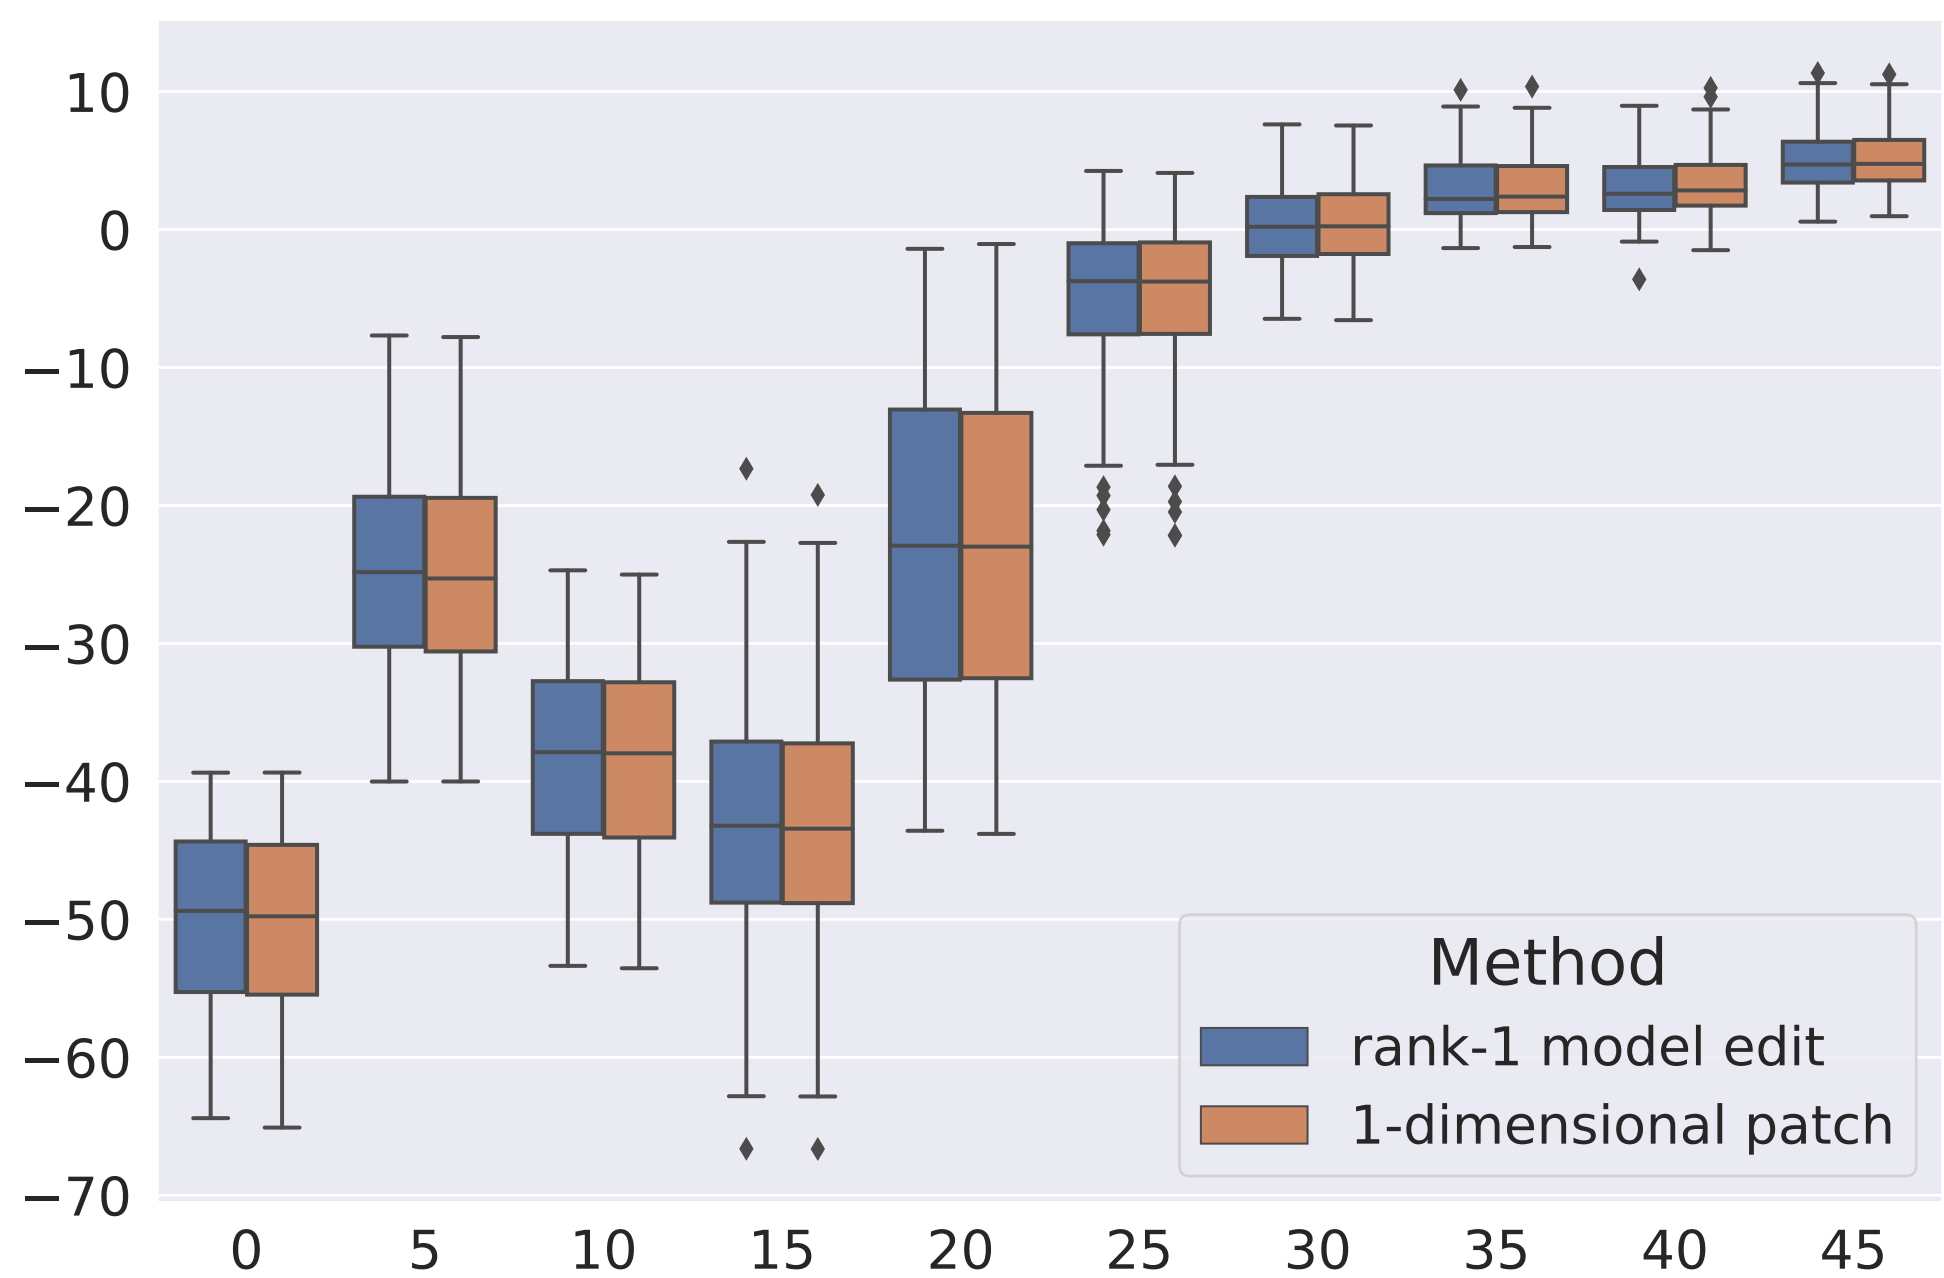

Supplement: supplementary_material [file attachment]

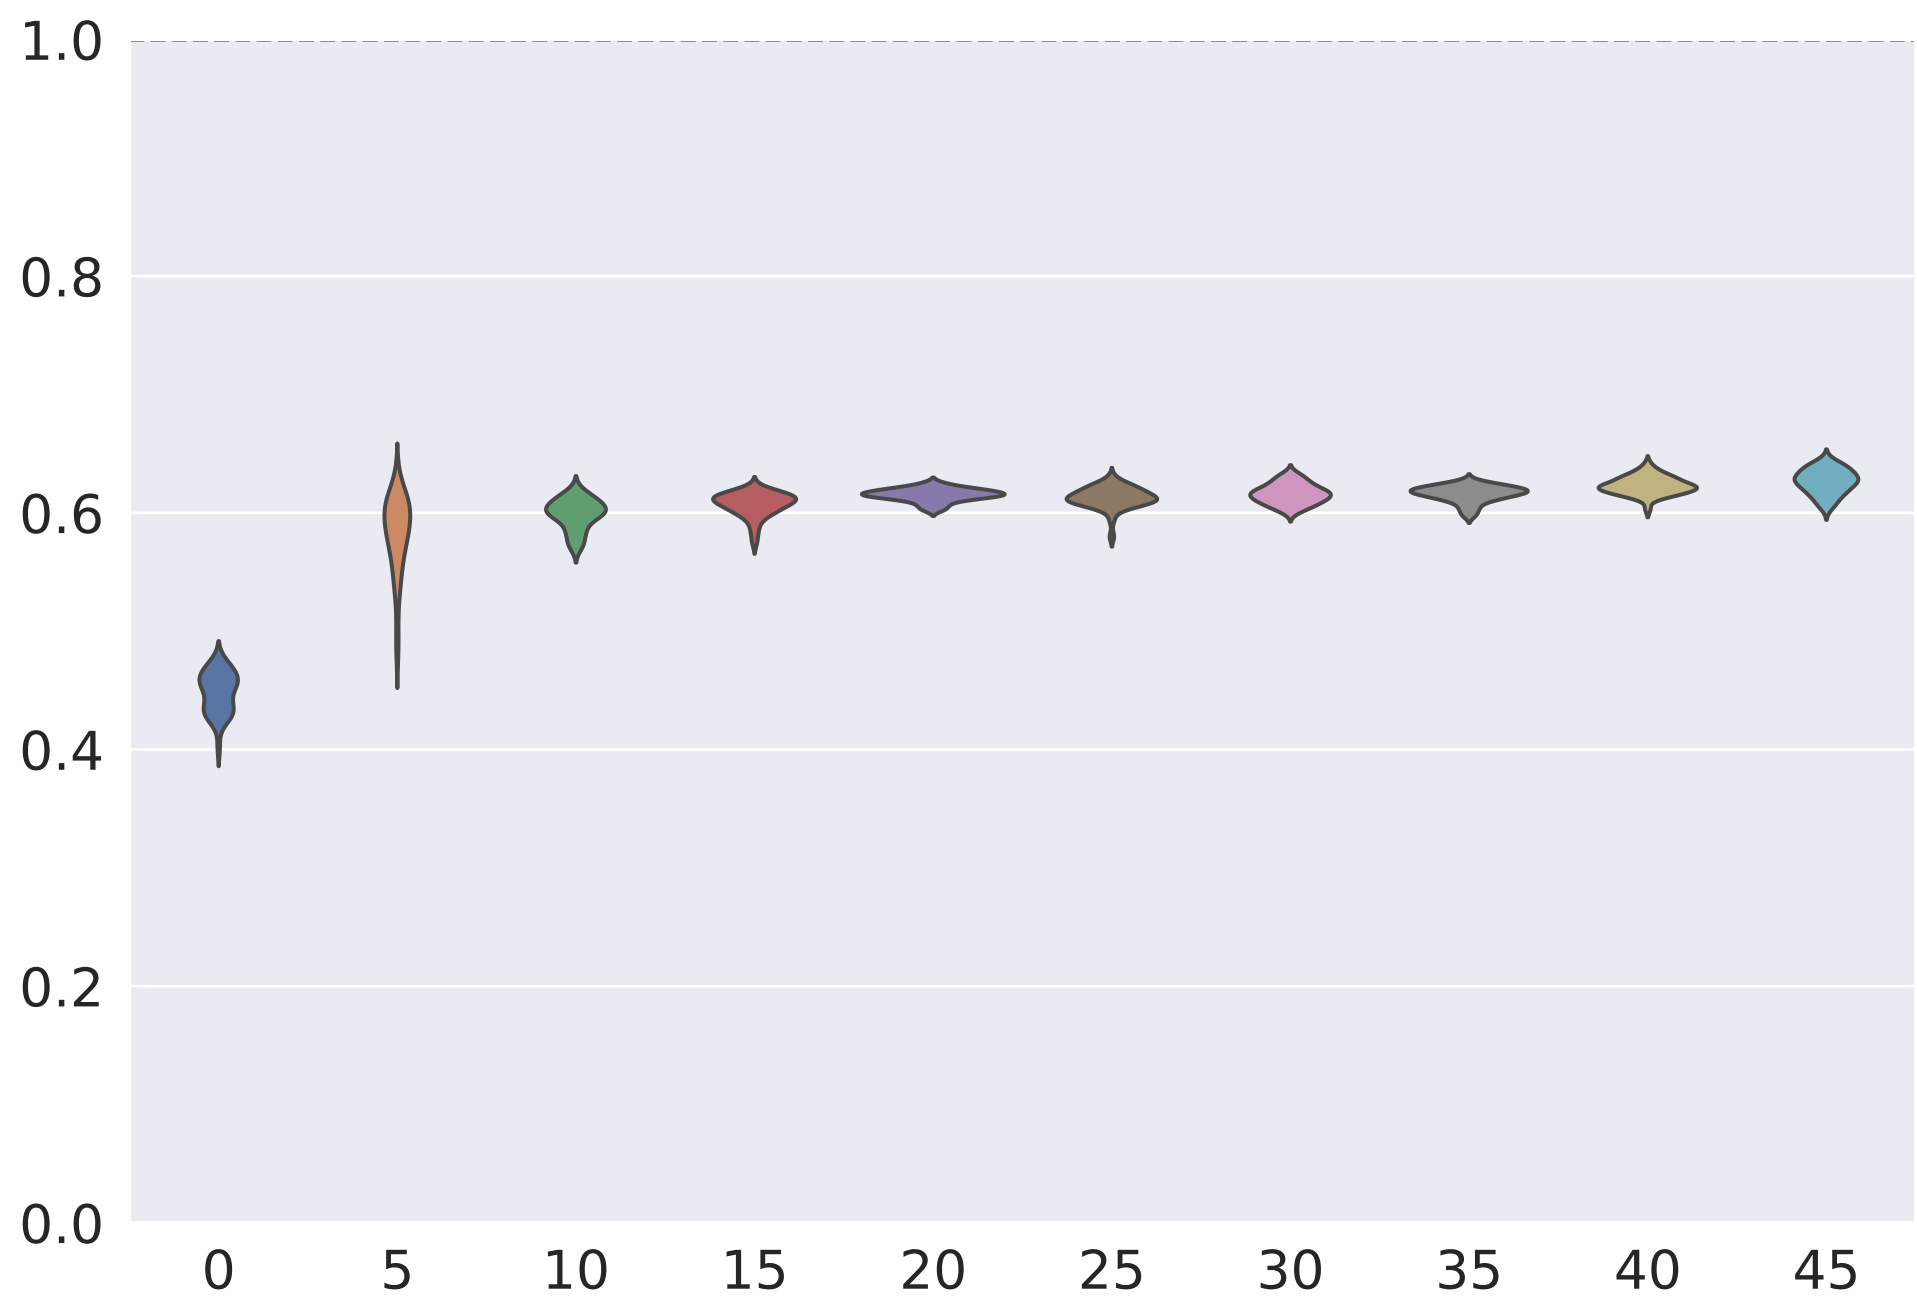

Supplement: supplementary_material [file attachment]

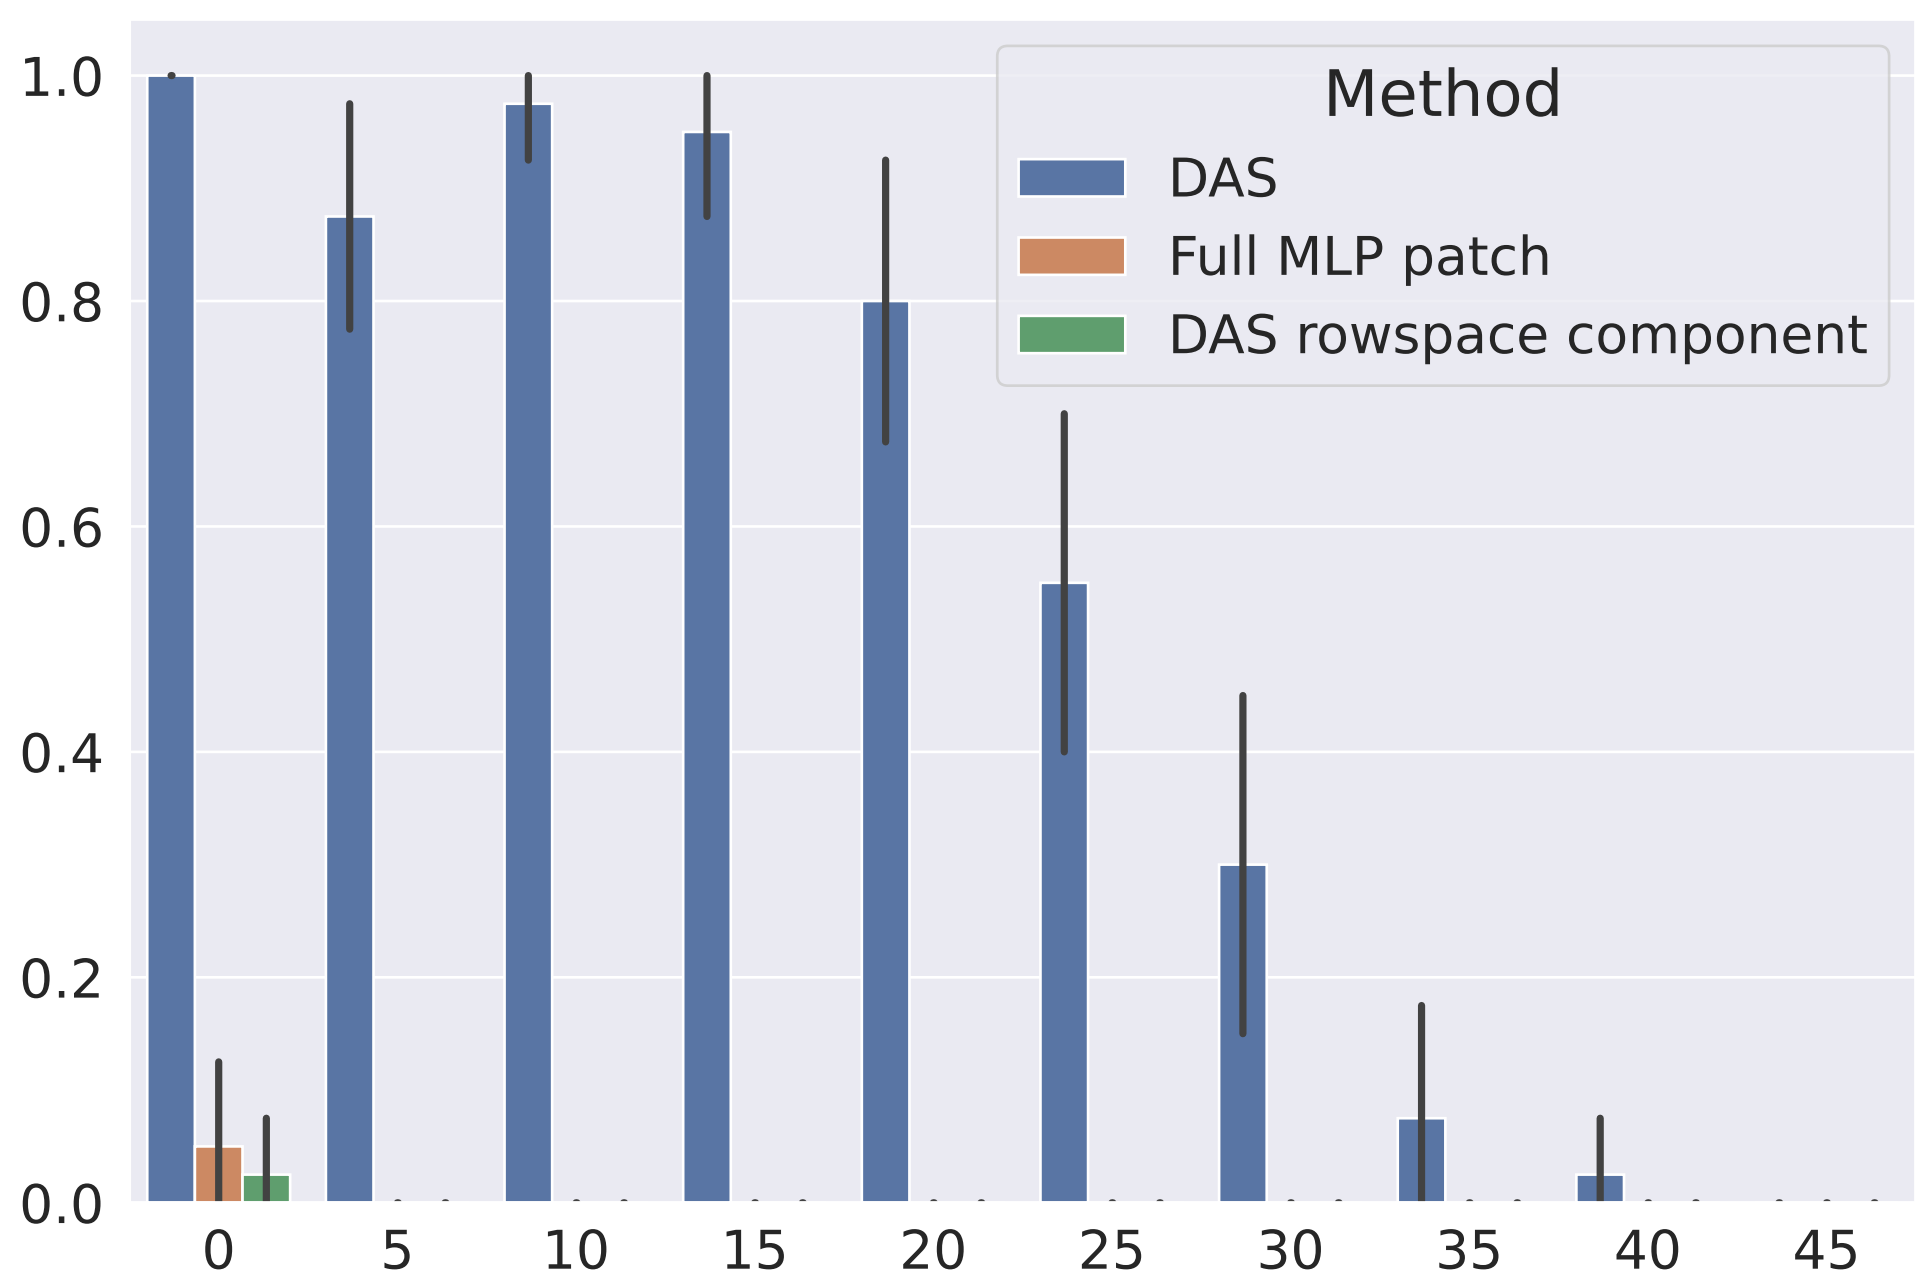

Supplement: supplementary_material [file attachment]

layer 35

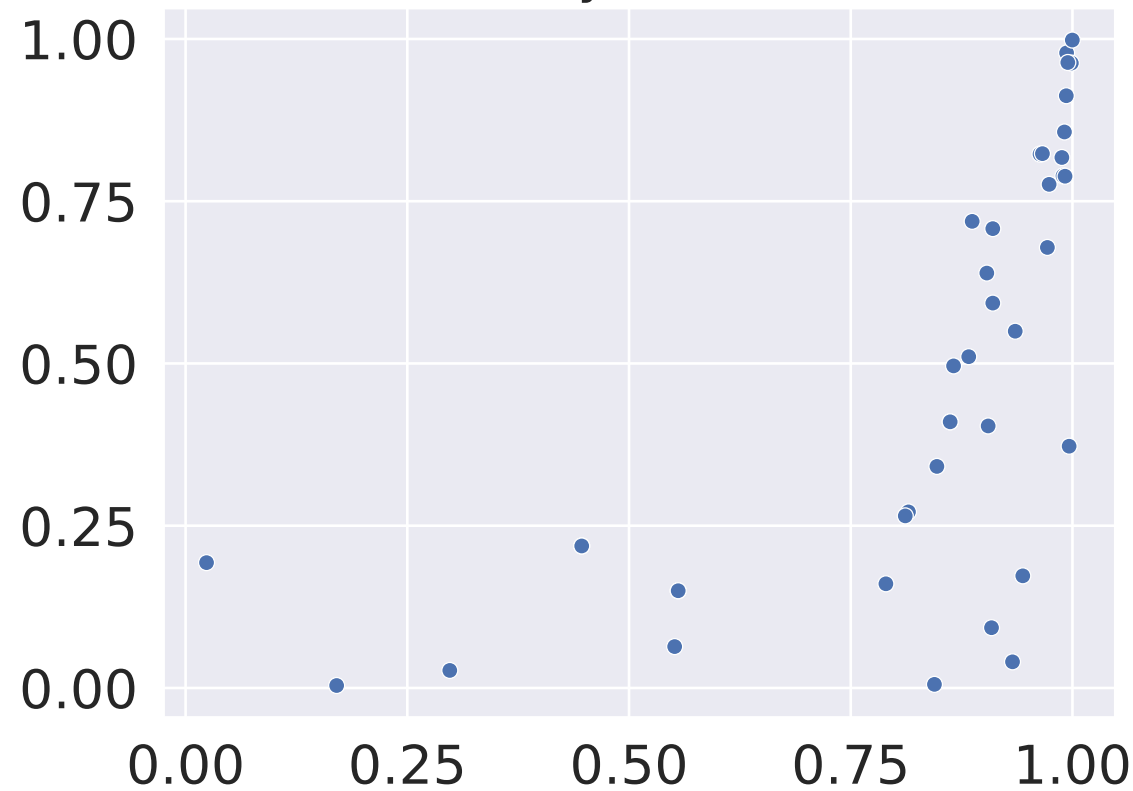

Supplement: supplementary_material [file attachment]

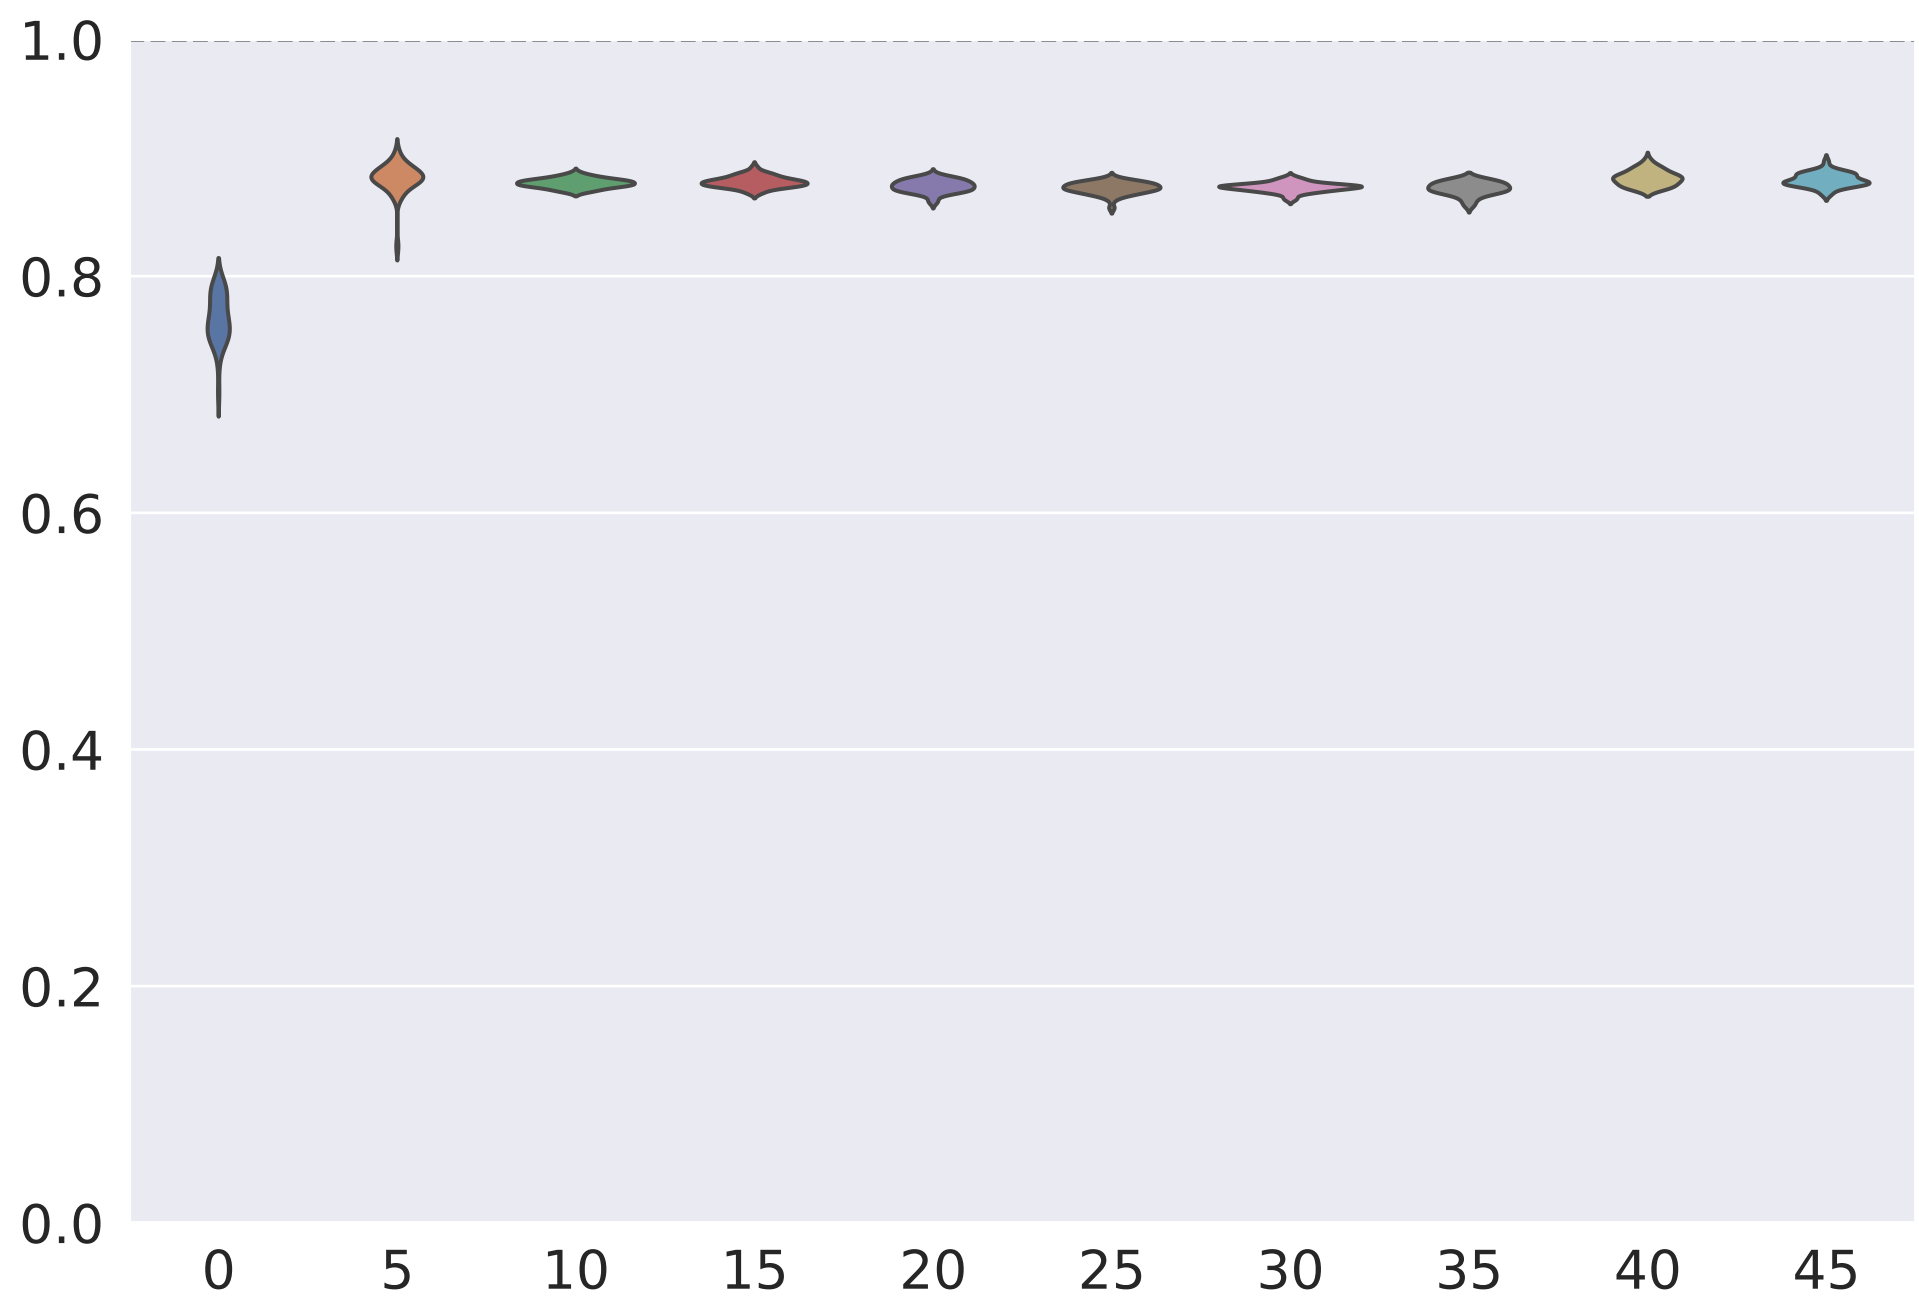

Supplement: supplementary_material [file attachment]

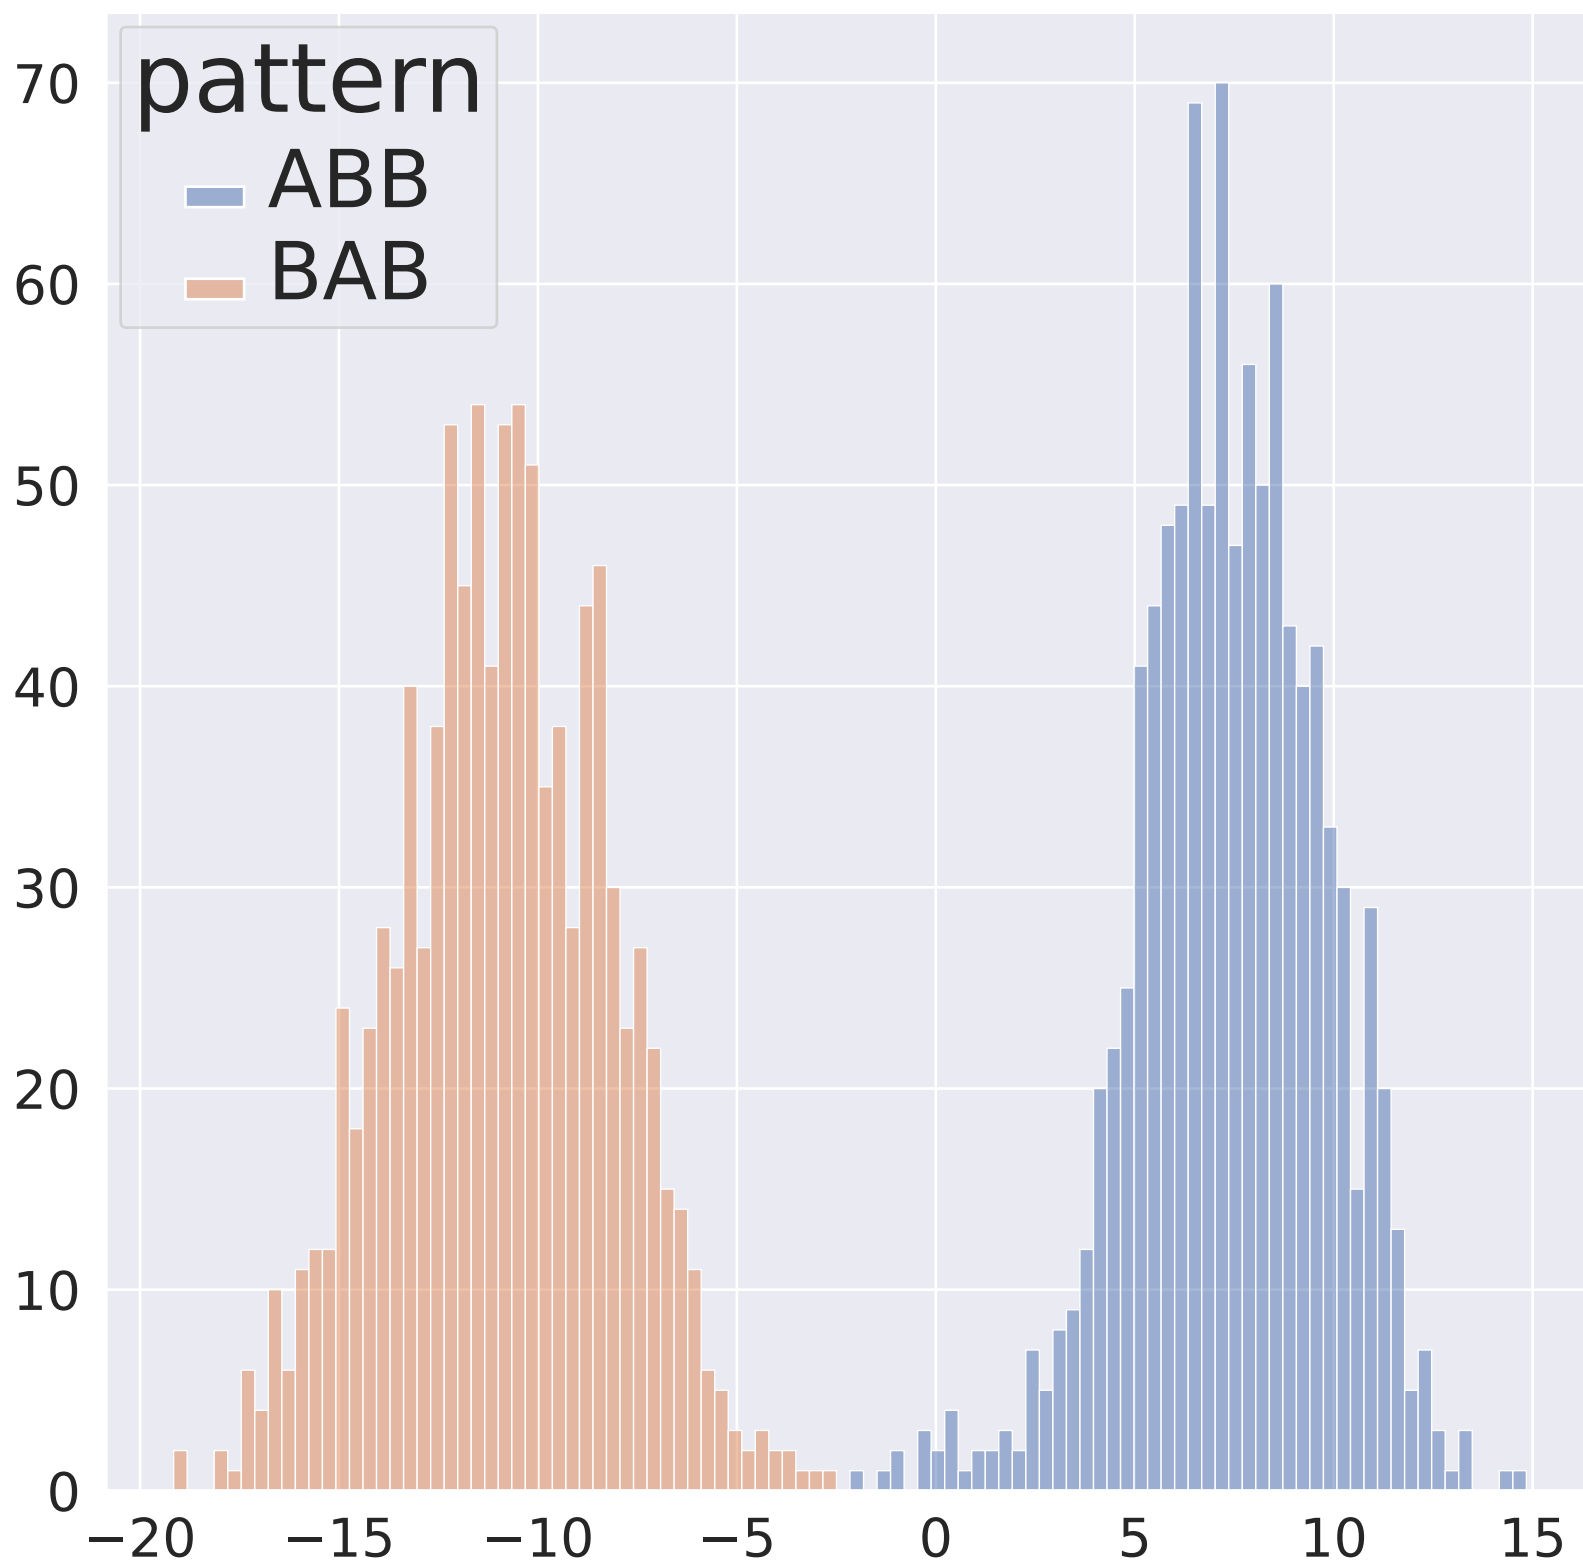

Supplement: supplementary_material [file attachment]

1e-5

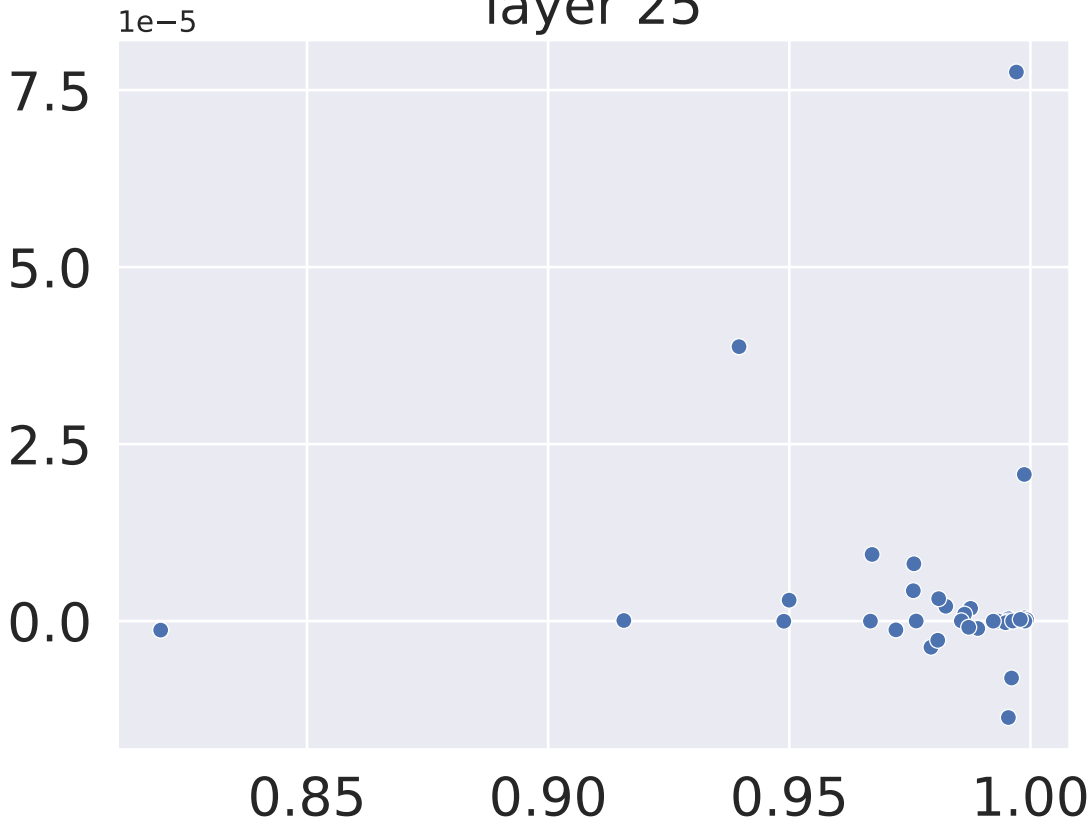

Supplement: supplementary_material [file attachment]

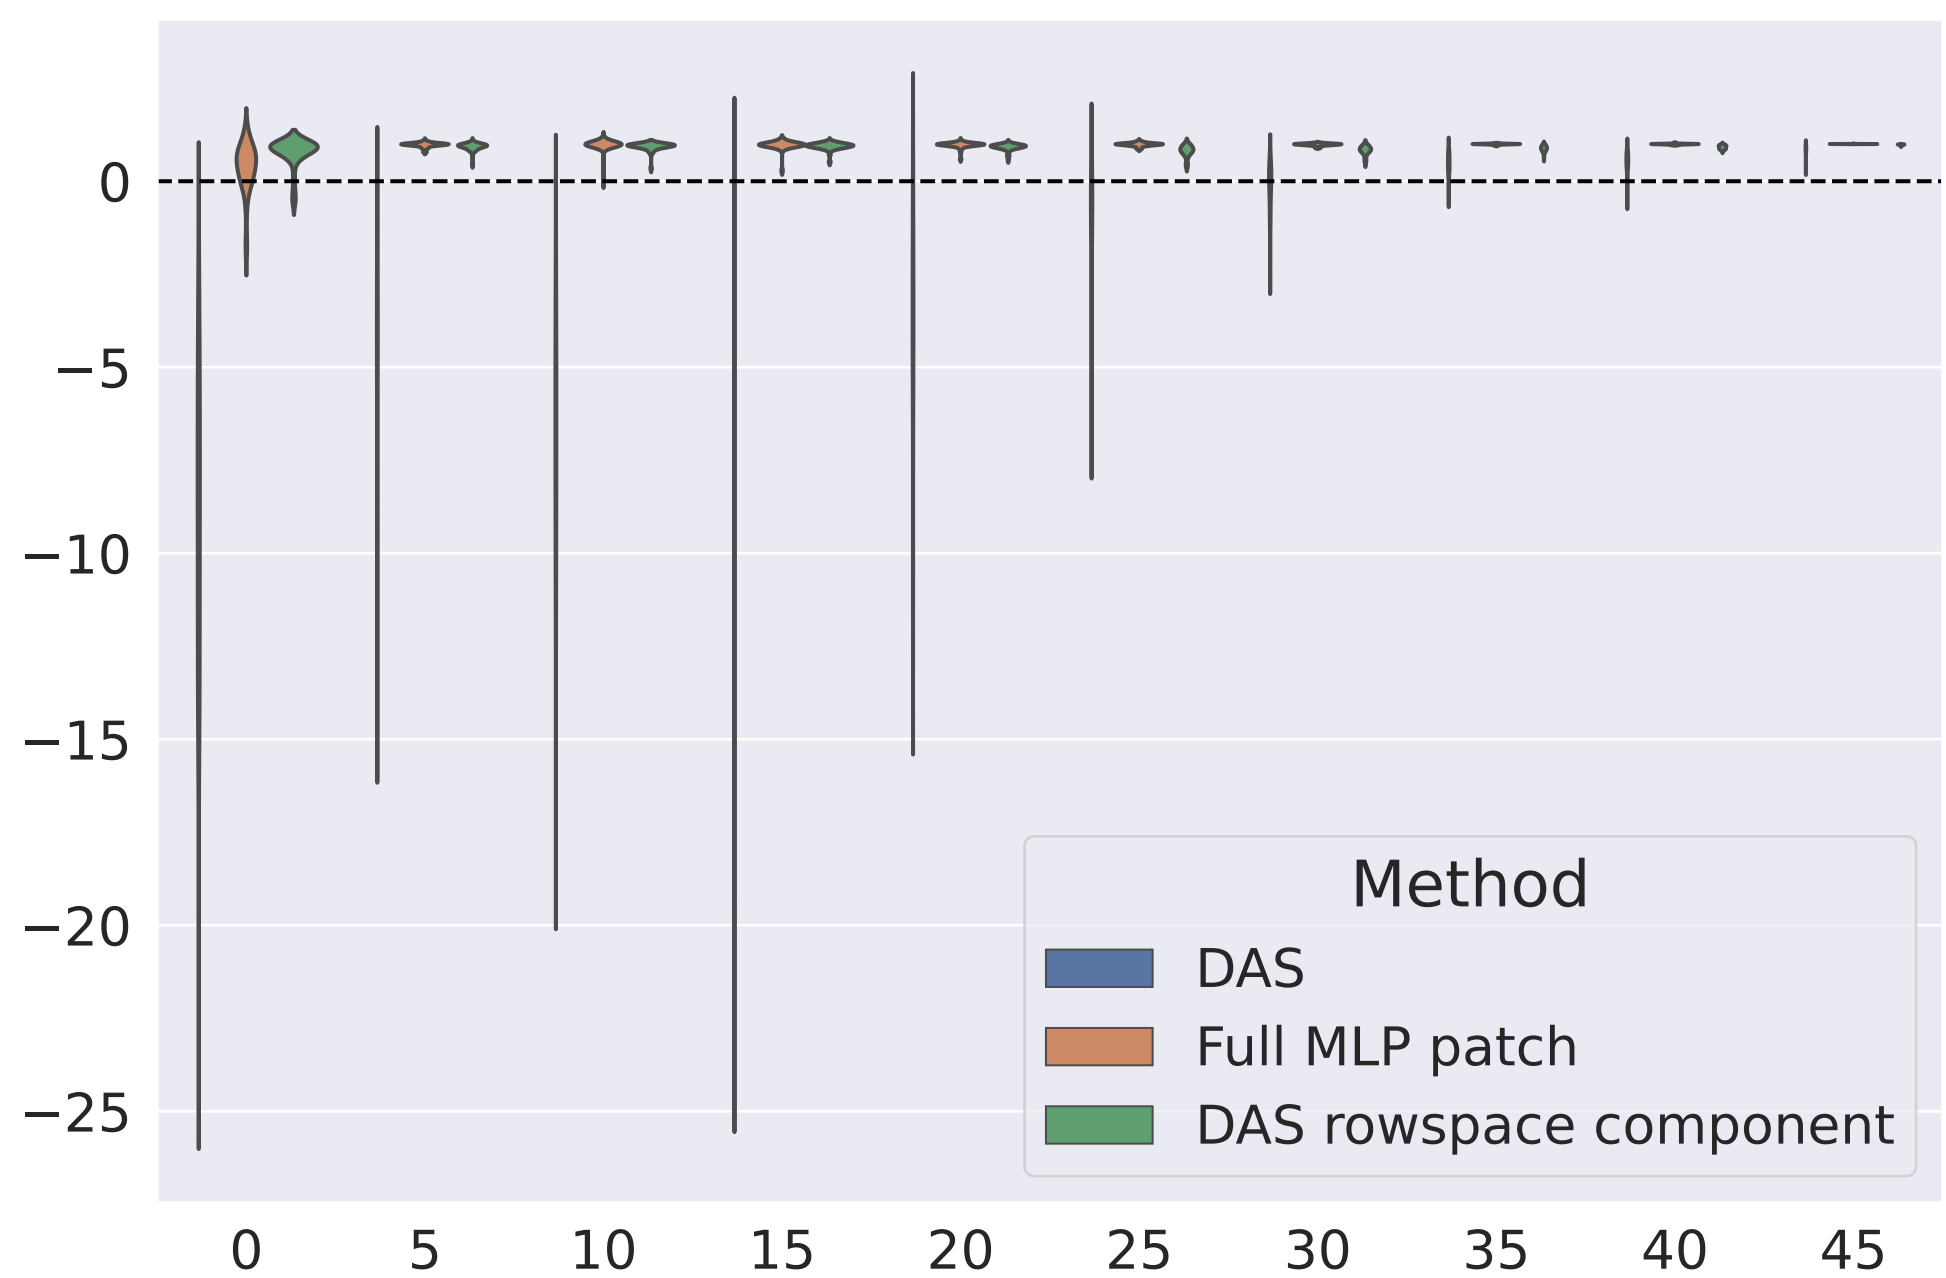

Supplement: supplementary_material [file attachment]

layer 20

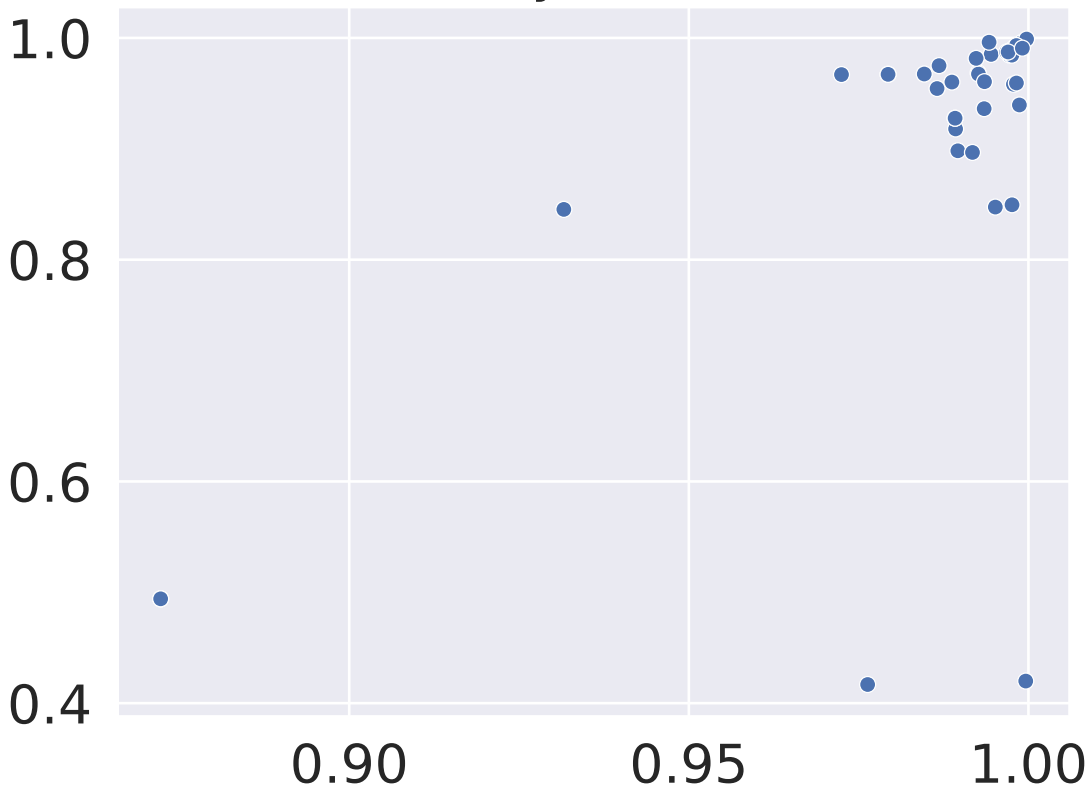

Supplement: supplementary_material [file attachment]

layer 25

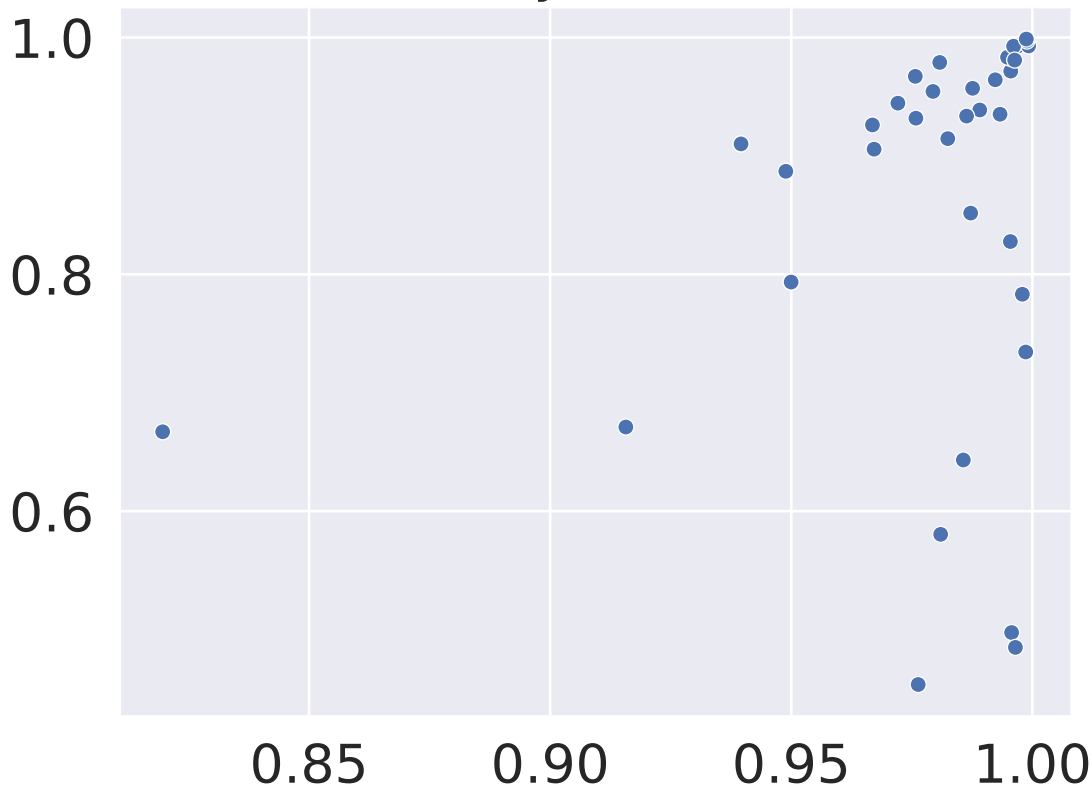

Supplement: supplementary_material [file attachment]

layer 30

$1e-5$

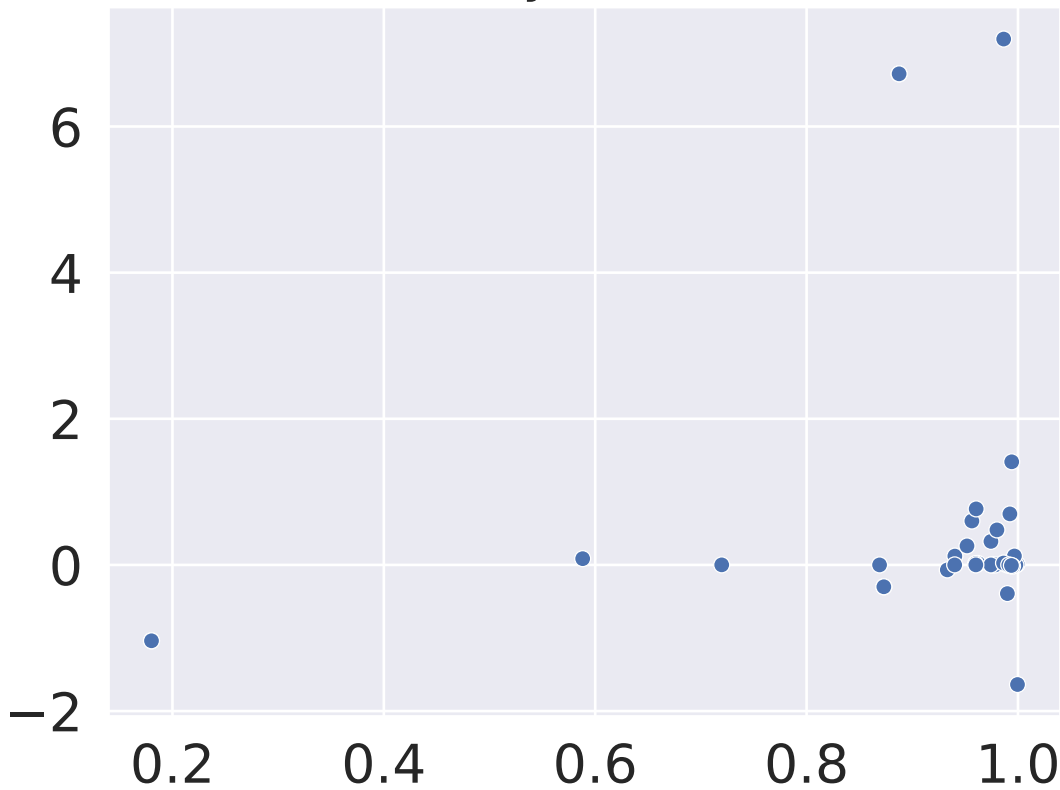

Supplement: supplementary_material [file attachment]

1e-5

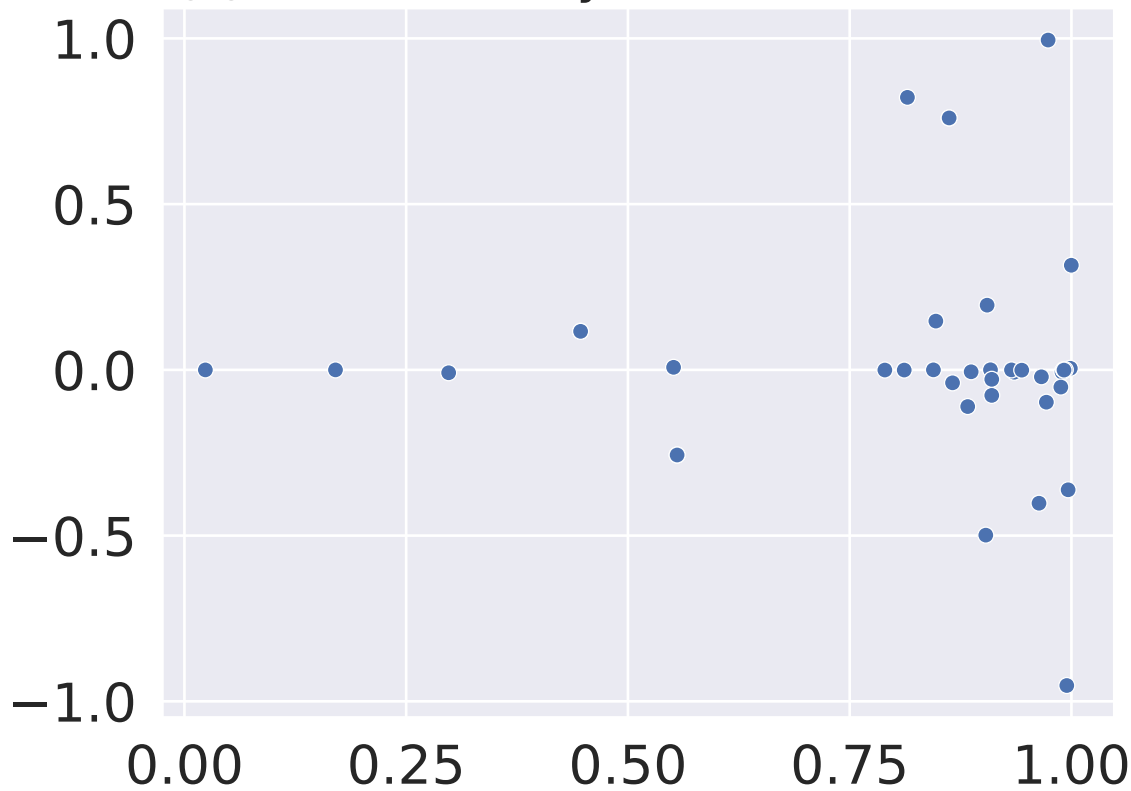

Supplement: supplementary_material [file attachment]

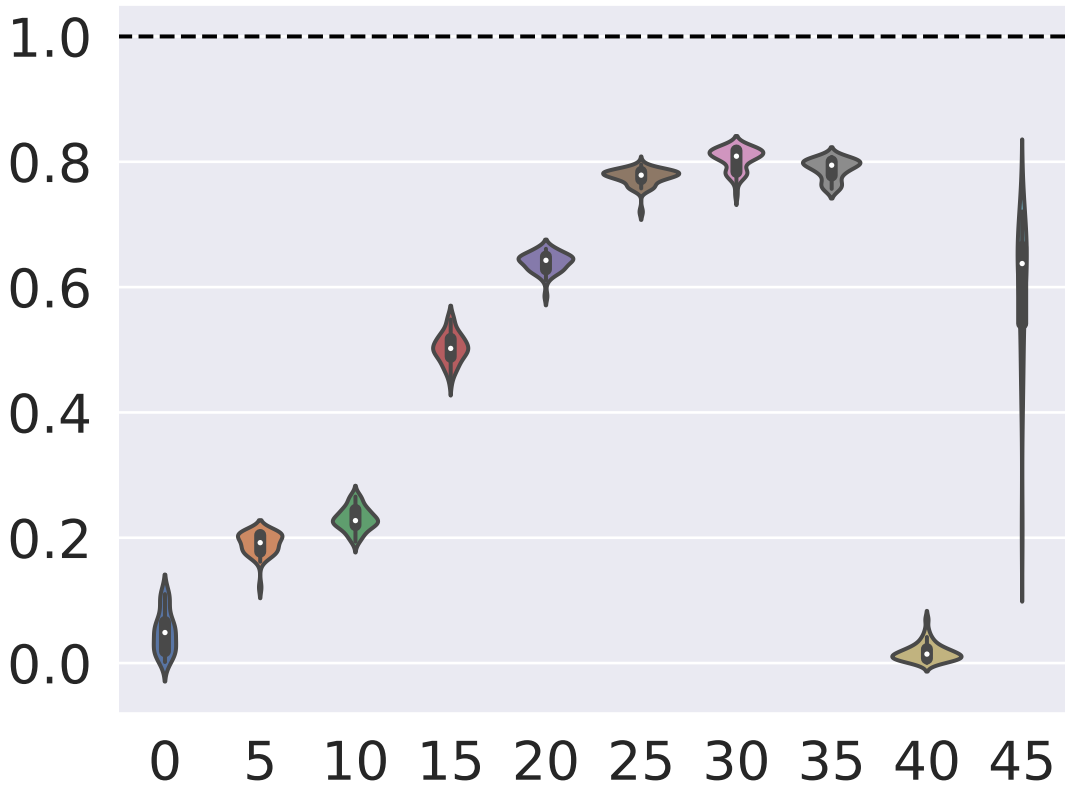

Supplement: supplementary_material [file attachment]

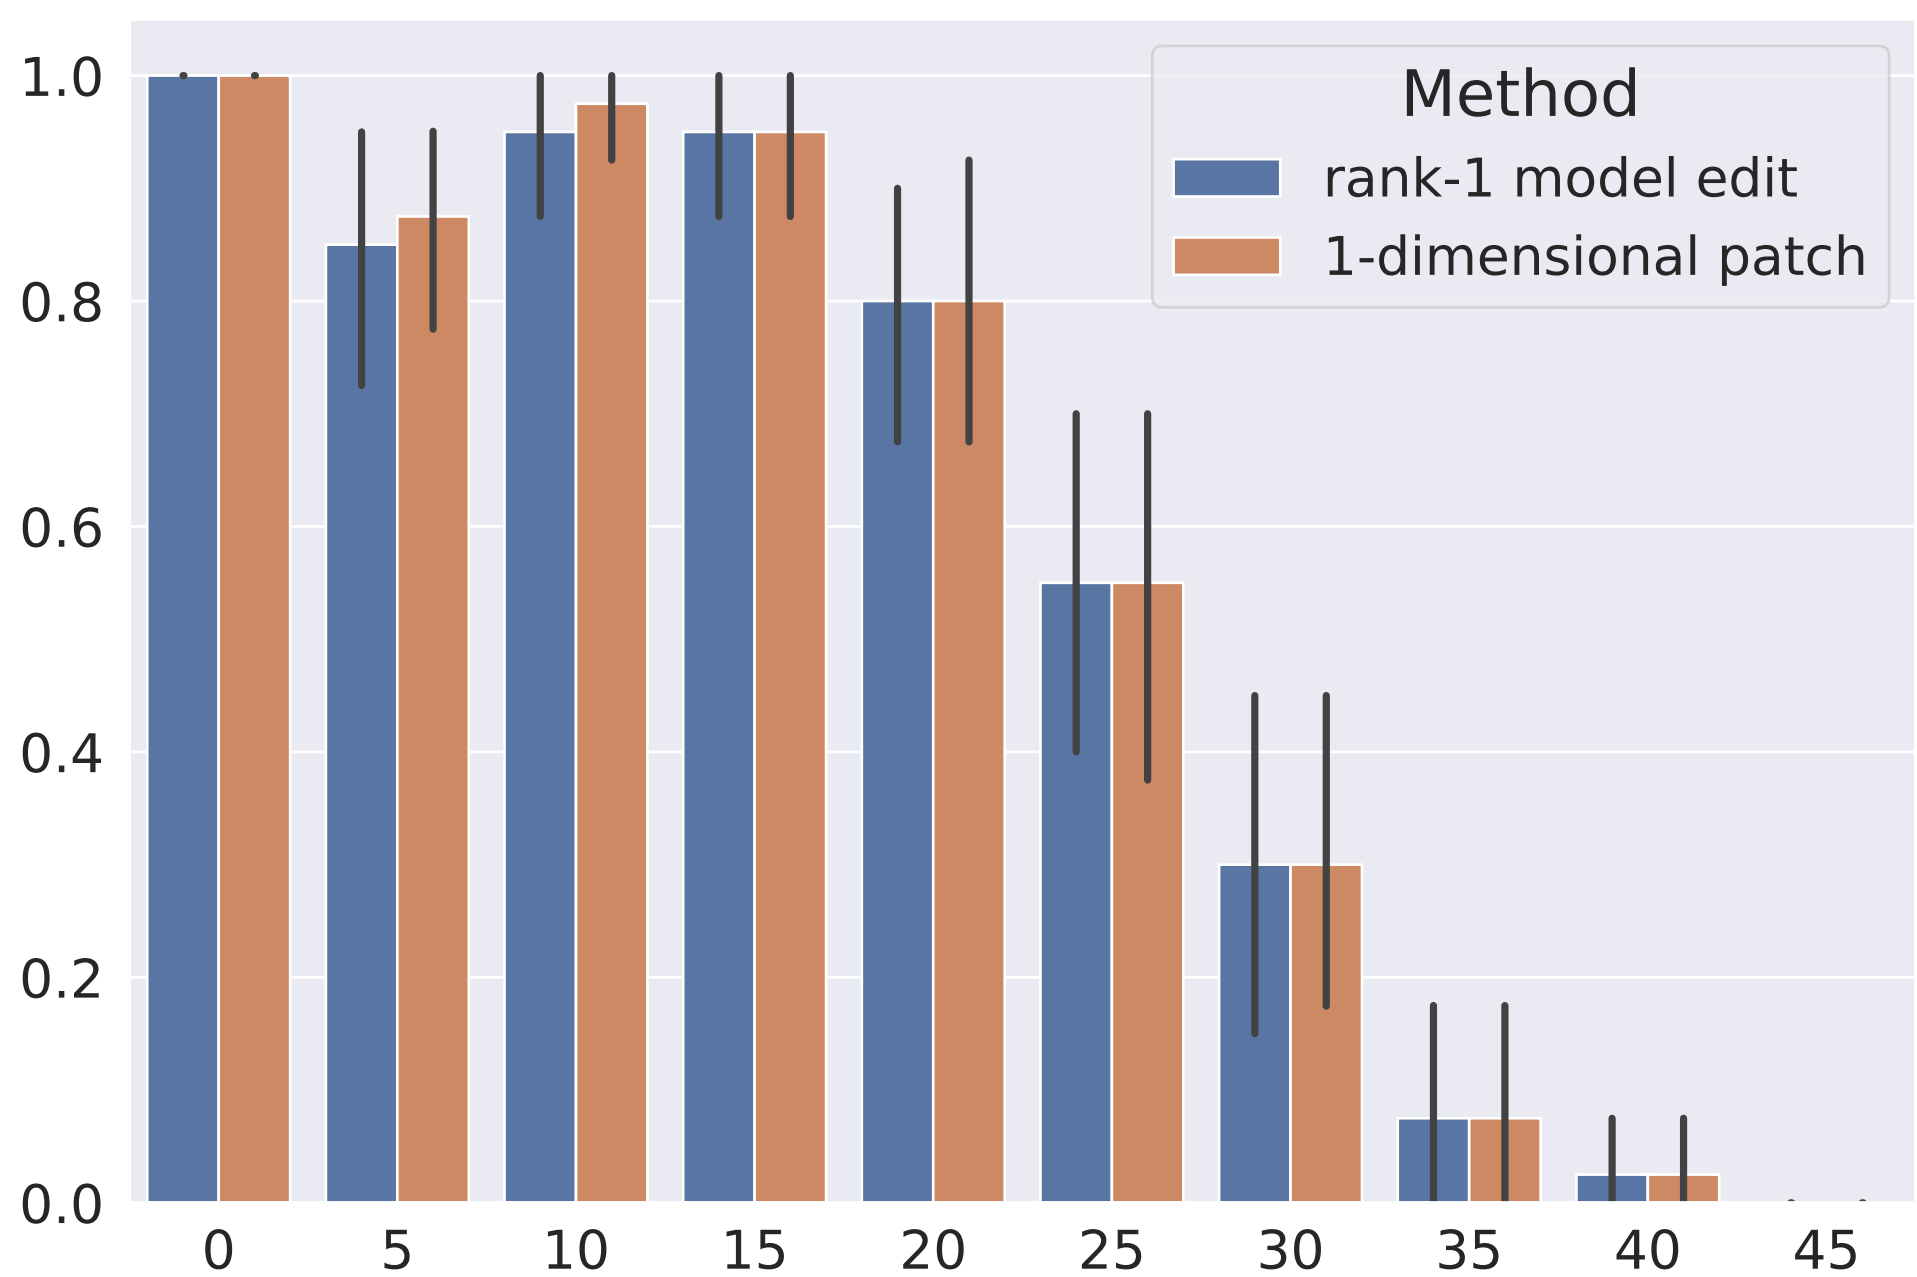

Supplement: supplementary_material [file attachment]

Layer 0 ( $r^2 = 0.38$ )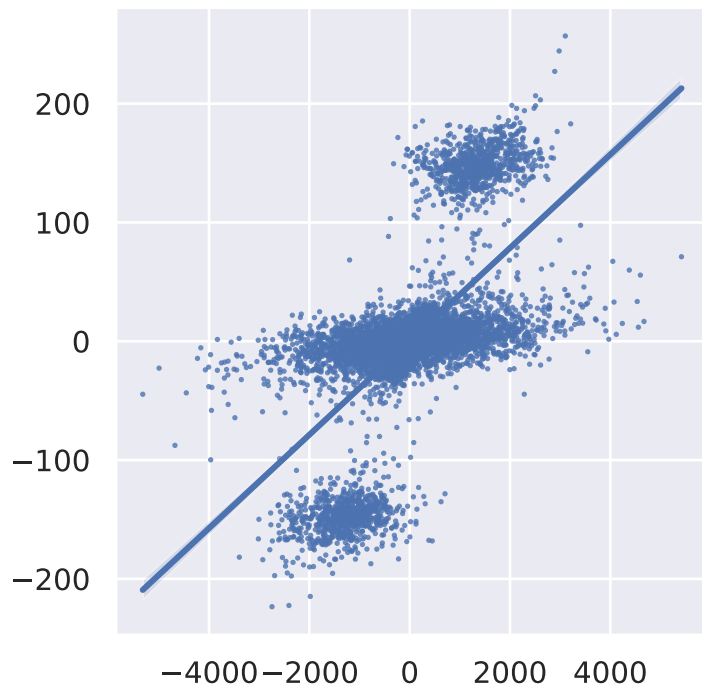Layer 1 ( $r^2 = 0.79$ )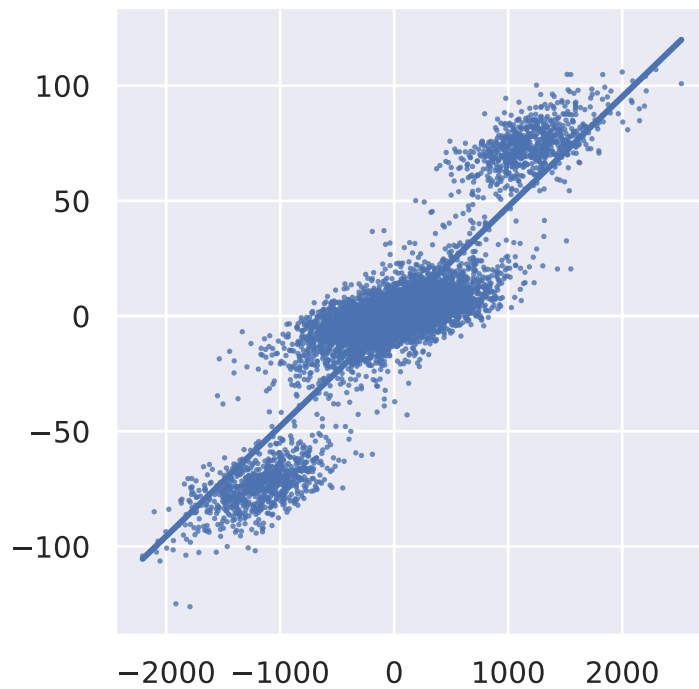Layer 2 ( $r^2 = 0.88$ )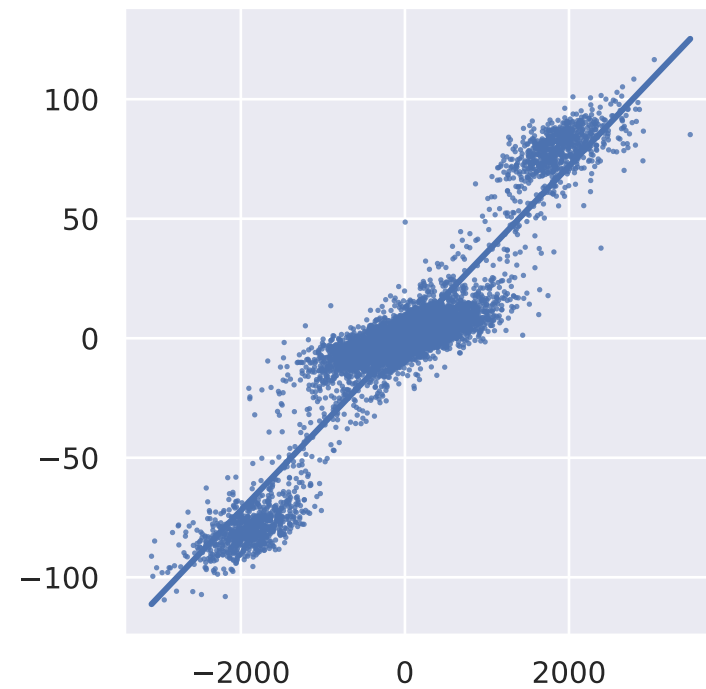Layer 3 ( $r^2 = 0.84$ )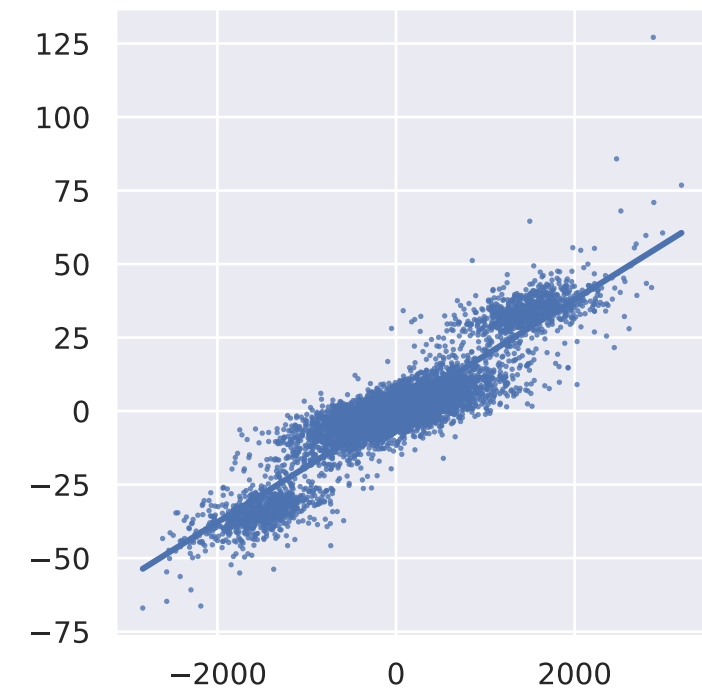Layer 4 ( $r^2 = 0.88$ )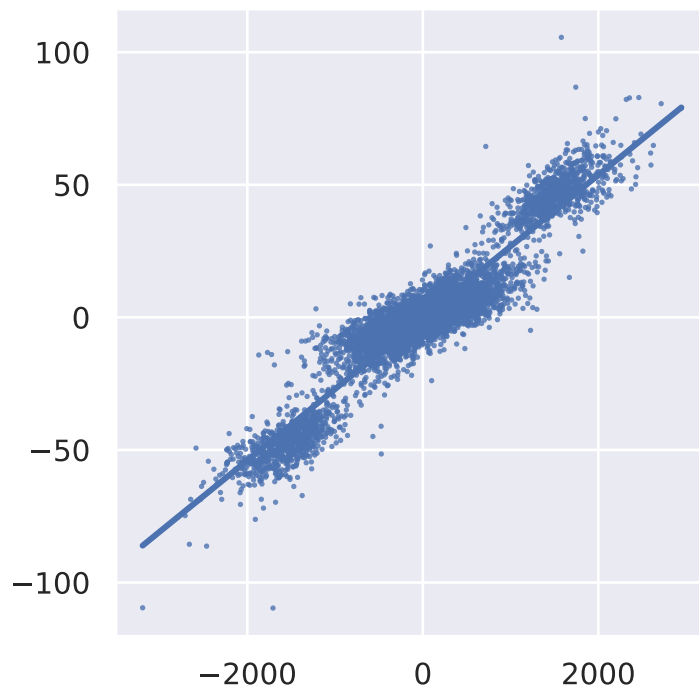Layer 5 ( $r^2 = 0.88$ )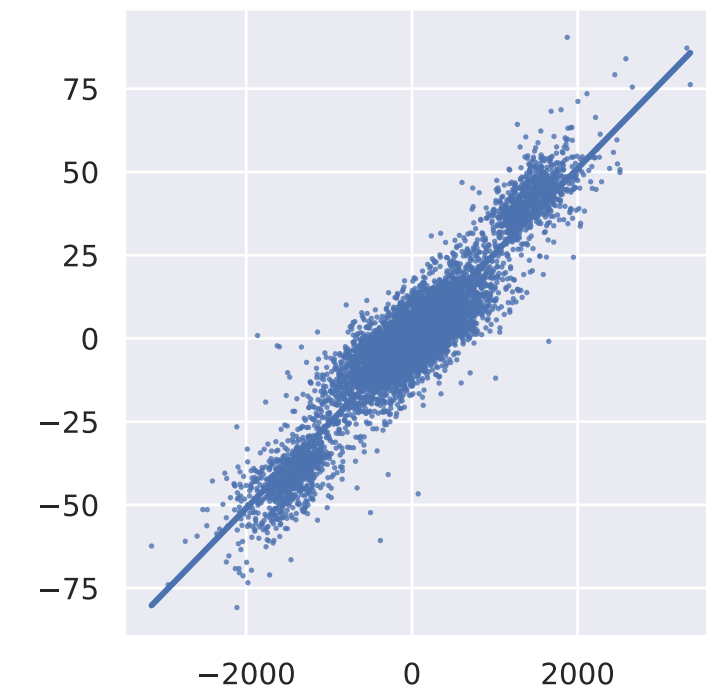Layer 6 ( $r^2 = 0.89$ )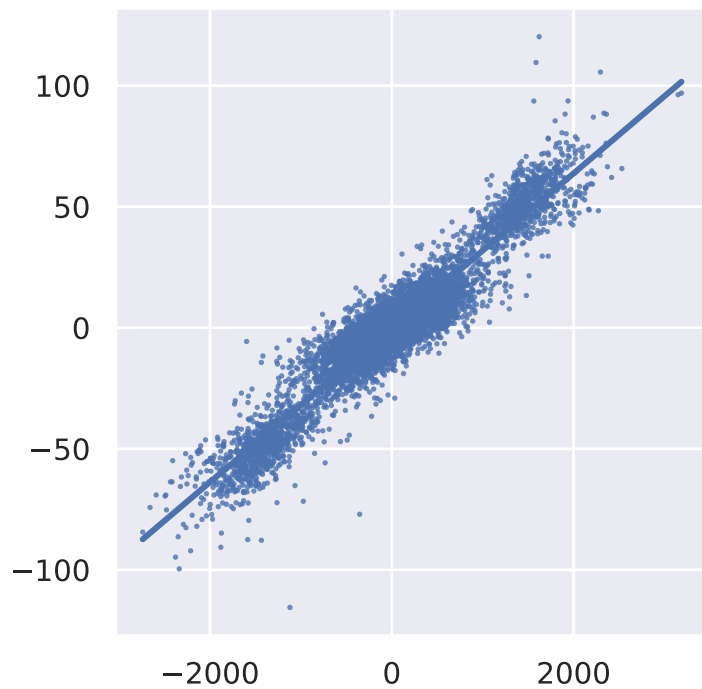Layer 7 ( $r^2 = 0.86$ )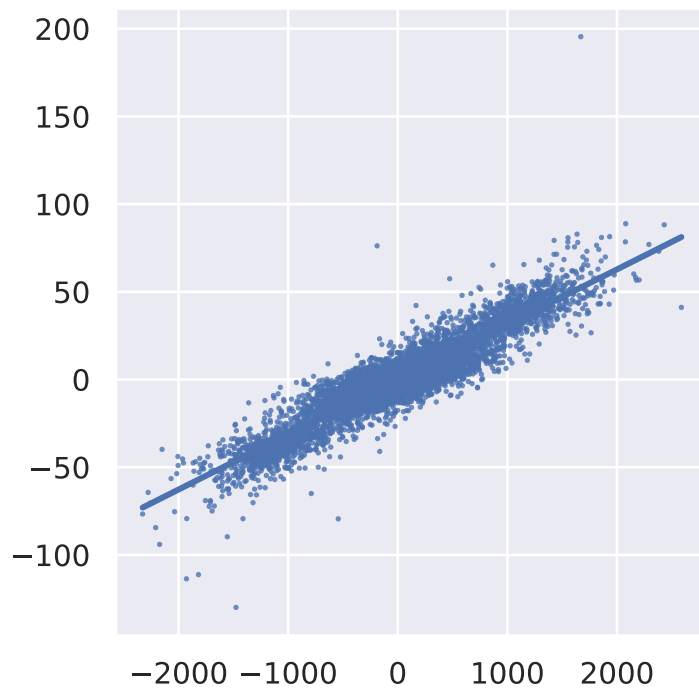Layer 8 ( $r^2 = 0.79$ )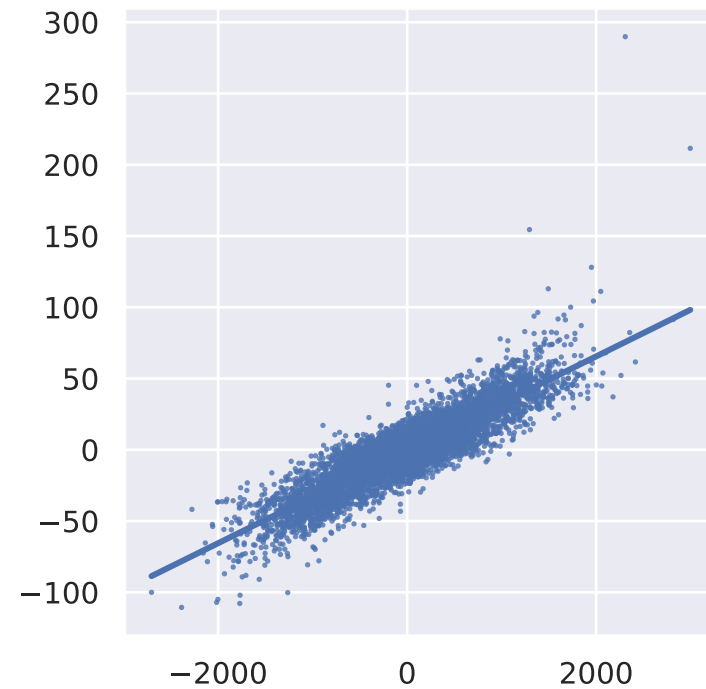Layer 9 ( $r^2 = 0.78$ )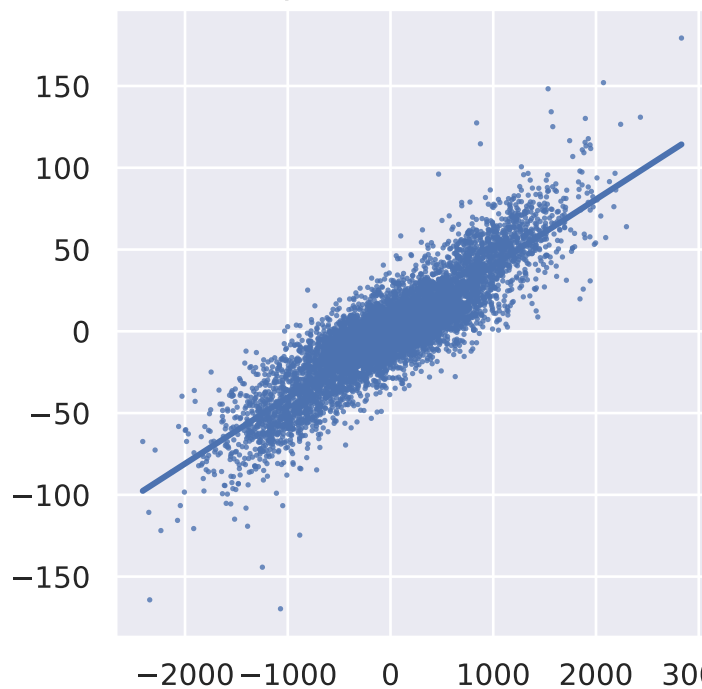Layer 10 ( $r^2 = 0.78$ )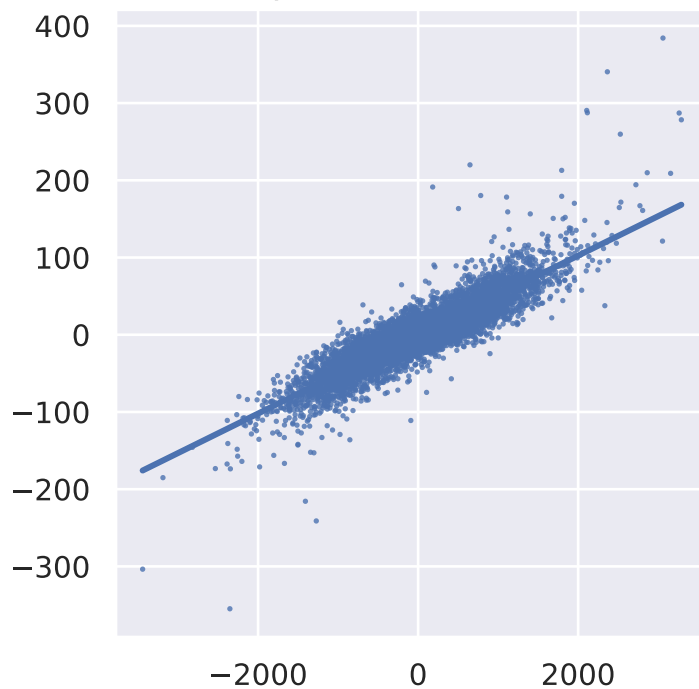Layer 11 ( $r^2 = 0.71$ )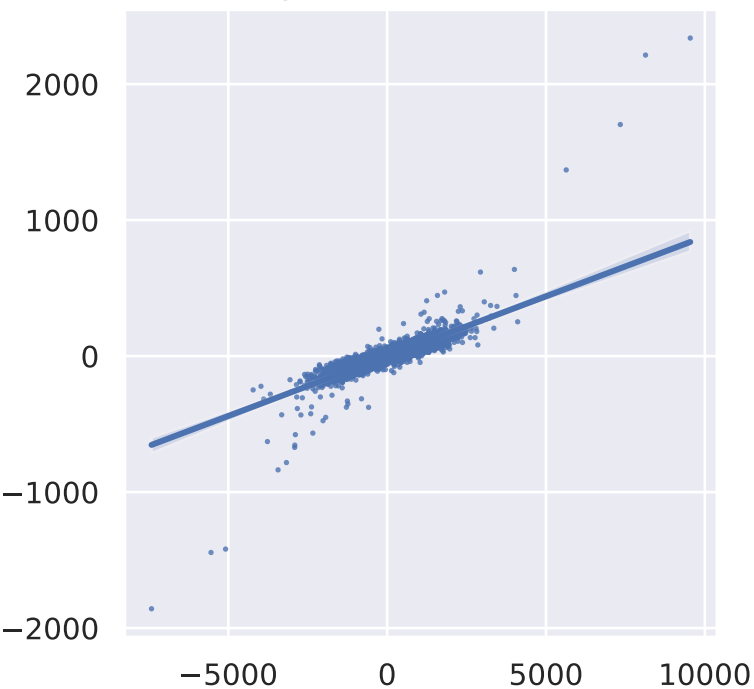

Supplement: supplementary_material [file attachment]
